# Supplementary material
Source: publisher site journal article supplement (https://www.dovepress.com/article/331291)
Supplement: Supplementary file 1 [file get_supplementary_file.php]

**Figure S1. Construction and Validation of FPI Model.**

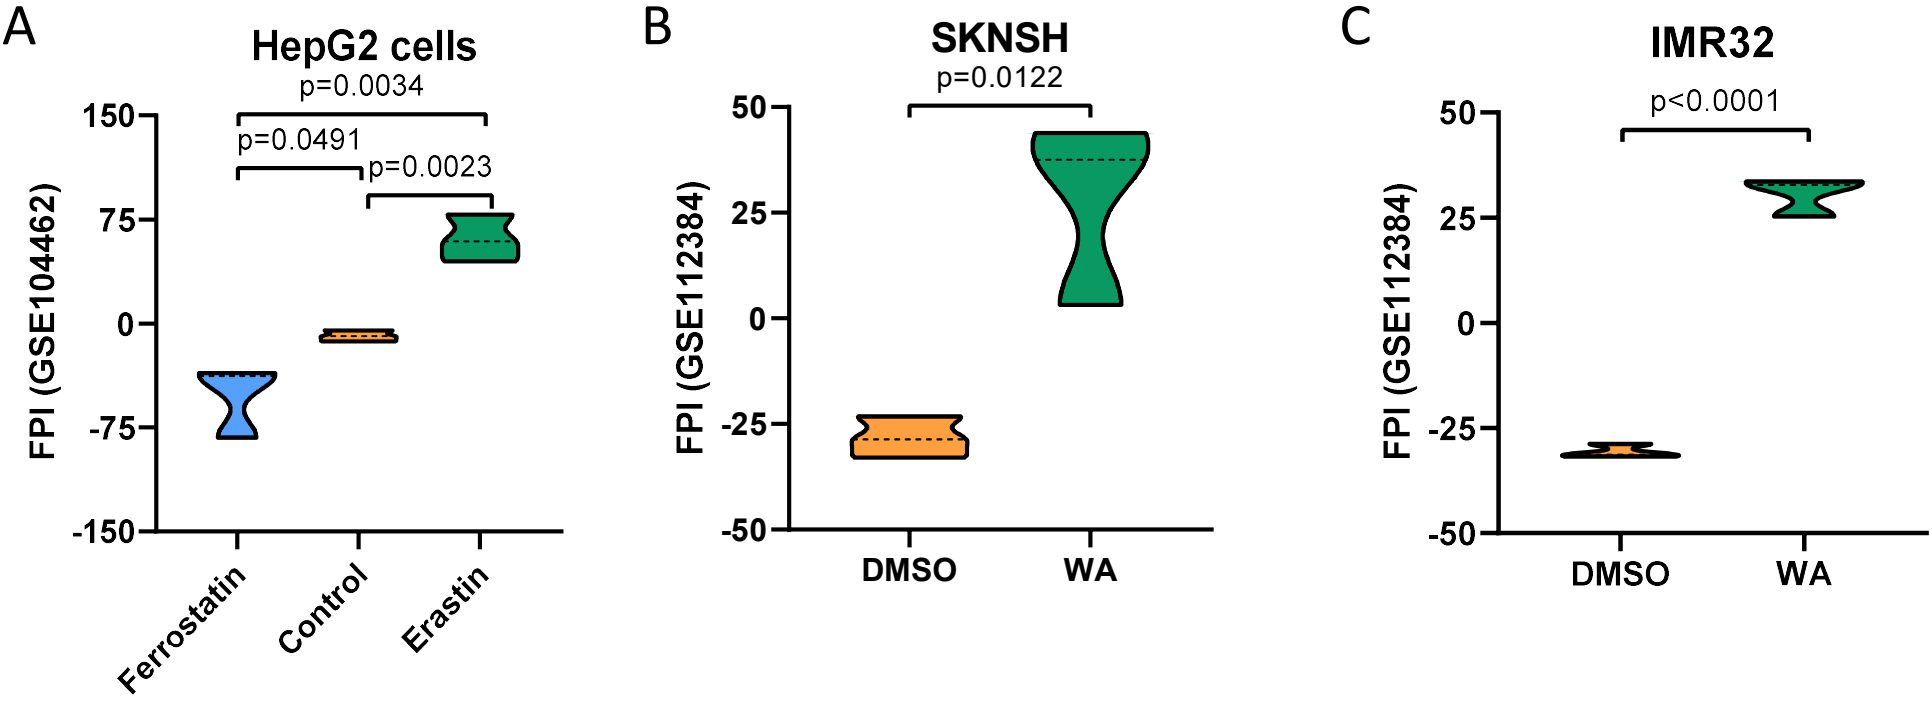

**Table S1. The 121 human-related and validated ferroptosis-related genes.**

RPL8  
IREB2  
ATP5MC3  
CS  
EMC2  
ACSF2  
G6PD  
PGD  
VDAC2  
TP53  
CARS1  
KEAP1  
HMOX1  
ATG5  
ATG7  
NCOA4  
TF  
ALOX5  
ALOX12  
ALOX12B  
ALOX15  
ALOX15B  
ALOXE3  
PHKG2  
ACSL4  
SAT1  
EGFR  
NOX4  
MAPK3  
MAPK1  
ZEB1  
DPP4  
CDKN2A  
PEBP1  
SOCS1  
CDO1  
MYB  
SLC1A5  
CHAC1  
LINC00472  
GOT1  
BECN1  
PRKAA2  
PRKAA1  
ELAVL1  
BAP1  
ABCC1  
MIR6852  
ACVR1B  
TGFB1  
IFNG  
ANO6  
HMGB1  
TNFAIP3  
ATF3  
ATM  
YY1AP1

EGLN2  
MIOX  
TAZ  
MTDH  
IDH1  
PANX1  
LONP1  
SLC7A11  
GPX4  
AKR1C1  
AKR1C2  
AKR1C3  
RB1  
HSPB1  
HSF1  
NFE2L2  
SQSTM1  
NQO1  
FTH1  
MUC1  
MT1G  
SLC40A1  
CISD1  
HSPA5  
ATF4  
HELLS  
SCD  
FADS2  
SRC  
STAT3  
PML  
NFS1  
TP63  
CDKN1A  
MIR137  
FH  
CISD2  
MIR9-1  
MIR9-2  
MIR9-3  
CBS  
ISCU  
ACSL3  
OTUB1  
CD44  
LINC00336  
BRD4  
PRDX6  
MIR17  
SESN2  
NF2  
ARNTL  
HIF1A  
CA9  
TMBIM4  
AIFM2  
LAMP2  
ZFP36

PROM2  
CHMP5  
CHMP6  
CAV1  
GCH1  
PTGS2

**Table S2. The gene sets used for marking immune cells.**

|                          |         |          |          |         |         |          |          |
|--------------------------|---------|----------|----------|---------|---------|----------|----------|
| Activated B cell         | ADAM28  | CD180    | CD79B    | BLK     | CD19    | MS4A1    | TNFRSF17 |
| Activated CD4 T cell     | AIM2    | BIRC3    | BRIP1    | CCL20   | CCL4    | CCL5     | CCNB1    |
| Activated CD8 T cell     | ADRM1   | AHSA1    | C1GALT1C | CCT6B   | CD37    | CD3D     | CD3E     |
| Central memory CD4       | ABHD3   | AHNAK    | ANXA2P2  | AQP3    | ATHL1   | BMI1     | BZW2     |
| Central memory CD8       | ACTN4   | ADAM12   | ADCY9    | F13A1   | FCER1G  | FCGR3B   | FGF7     |
| Effector memory CD       | ATM     | CASP3    | CASQ1    | CD300E  | DARS    | DOCK9    | EXOSC9   |
| Effector memory CD       | ACAP1   | APOL3    | ARHGAP1  | ATP10D  | C3AR1   | CCR5     | CD160    |
| Gamma delta T cell       | ACP5    | AQP9     | BTN3A2   | C1orf54 | CARD8   | CCL18    | CD209    |
| Immature B cell          | CD22    | CYBB     | FAM129C  | FCRL1   | FCRL3   | FCRL5    | FCRLA    |
| Memory B cell            | AICDA   | CCNA2    | CDKN3    | CLCN5   | ENPP1   | FCER1A   | FCRL4    |
| Regulatory T cell        | CCL3L1  | CD72     | CLEC5A   | FOXP3   | ITGA4   | L1CAM    | LIPA     |
| T follicular helper cell | B3GAT1  | CDK5R1   | PDCD1    | BCL6    | CD200   | CD83     | CD84     |
| Type 1 T helper cell     | CD70    | TBX21    | ADAM8    | AHCYL2  | ALCAM   | B3GALNT1 | BBS12    |
| Type 17 T helper cell    | IL17A   | IL17RA   | C2CD4A   | C2CD4B  | CA2     | CCDC65   | CEACAM3  |
| Type 2 T helper cell     | ASB2    | CSRP2    | DAPK1    | DLC1    | DNAJC12 | DUSP6    | GNAI1    |
| Activated dendritic ce   | ABCD1   | C1QC     | CAPG     | CCL3L3  | CD207   | CD302    | ATP5B    |
| CD56bright natural ki    | ABAT    | C11orf75 | C5orf15  | CDHR1   | DCAF12  | DYNLL1   | GPR137B  |
| CD56dim natural kille    | CYP27A1 | DDX55    | DYRK2    | RPL37A  | NOTCH3  | AKR7A3   | GPRC5C   |
| Eosinophil               | GIPR    | KRT18P50 | LRMP     | FOSB    | RRP12   | GPR183   | NR4A3    |
| Immature dendritic ce    | ACADM   | AHCYL1   | ALDH1A2  | ALDH3A2 | ALDH9A1 | ALOX15   | AMT      |
| Macrophage               | AIF1    | CCL1     | CCL14    | CCL23   | CCL26   | CD300LB  | CNR1     |
| Mast cell                | ADAMTS3 | CPA3     | CMA1     | CTSG    | ARHGAP1 | CPM      | FCN1     |
| MDSC                     | CCR2    | CD14     | CD2      | CD86    | CXCR4   | FCGR2A   | FCGR2B   |
| Monocyte                 | ASGR2   | CFP      | ASGR1    | CD1D    | UPK3A   | ACTG1    | ANXA5    |
| Natural killer cell      | AKT3    | AXL      | BST2     | CDH2    | CRTAM   | CSF2RA   | CTSZ     |
| Natural killer T cell    | BTN2A2  | CD101    | CD109    | CNPY3   | CNPY4   | CREB1    | CRTC2    |
| Neutrophil               | CREB5   | CDA      | CHST15   | S100A12 | APOBEC3 | CASP5    | MMP25    |
| Plasmacytoid dendriti    | CBX6    | DAB2     | DDX17    | HIGD1A  | IDH3A   | IL3RA    | MAGED1   |

|          |          |         |          |         |         |          |         |         |
|----------|----------|---------|----------|---------|---------|----------|---------|---------|
| IGHM     | GNG7     | MICAL3  | SPIB     | HLA-DOB | IGKC    | PNOC     | FCRL2   | BACH2   |
| CCR7     | DUSP2    | ESCO2   | ETS1     | EXO1    | EXOC6   | IARS     | ITK     | KIF11   |
| CD3G     | CD69     | CD8A    | CETN3    | CSE1L   | GEMIN6  | GNLY     | GPT2    | GZMA    |
| CD63     | COL4A1   | CYLD    | ELMO2    | FYN     | GLIPR1  | GSS      | IFITM2  | ITGB1   |
| FKBP4    | GLUD1    | GM2A    | GUSB     | IL1RN   | NOL11   | NTRK1    | RARA    | RNF128  |
| EZH2     | GDE1     | IL34    | NCOA4    | NEFL    | PDGFRL  | PTGS1    | REPS1   | SCG2    |
| CD55     | CFLAR    | CMKLR1  | DAPP1    | FCRL6   | FLT3LG  | GZMM     | HAPLN3  | HLA-DMB |
| CD33     | CD36     | CDK5    | IL10RB   | KLRF1   | LGALS1  | MAPK7    | KLHL7   | KRT80   |
| HDAC9    | HLA-DQA  | HVCN1   | KIAA0226 | NCF1    | NCF1B   | P2RY10   | SP100   | TXNIP   |
| MYC      | RUNX2    | SORL1   | SOX5     | STAT5A  | STAT5B  | TLR9     |         |         |
| LRP1     | LRRC42   | MARCO   | MMP12    | MNDA    | MRC1    | MS4A6A   | PELO    | PLEK    |
| FGF2     | GPR18    | CEBPA   | CECR1    | CLEC10A | CLEC4A  | CSF1R    | CTSS    | DMN     |
| BST1     | CD151    | CD47    | CD48     | CD52    | CD53    | CD59     | CD6     | CD68    |
| IL17C    | IL17F    | IL17RC  | IL17RE   | IL23A   | ILDR1   | LONRF3   | SH2D6   | TNIP2   |
| LAMP3    | NRP2     | OSBPL1A | PDE4B    | PHLDA1  | PLA2G4A | RAB27B   | RBMS3   | RNF125  |
| ATP5L    | ATP6V1A  | BCL2L1  | C1QB     | SNURF   | SPCS3   | CCNA1    | CEACAM8 | NOS2    |
| HCP5     | HDGFRP2  | KRT86   | MLST8    | ELMOD3  | ENTPD5  | FAM119A  | FAM179A | CLIC2   |
| GRIN1    | HLA-E    | PORCN   | PSMC4    | UPP1    | IL21R   | KIR2DS1  | KIR2DS2 | KIR2DS5 |
| ST3GAL6  | DEPDC5   | PDE6C   | PKD2L2   | GPR65   | IL5RA   | P2RY14   | DACH1   | DAPK2   |
| ARL1     | ATIC     | ATP5A1  | CAPZA1   | LILRA5  | RDX     | RRAGD    | TACSTD2 | INPP5F  |
| CNR2     | EIF1     | EIF4A1  | FPR1     | FPR2    | FRAT2   | GPR27    | GPR77   | RNASE2  |
| FTL      | HSPA6    | ITGA9   | RNASE3   | S100A4  | SIGLEC8 | SLC6A4   | PTGS2   | EGR3    |
| FCGR3A   | FERMT3   | GPSM3   | IL18BP   | IL4R    | ITGAL   | ITGAM    | PARVG   | PSAP    |
| ATP6V1B2 | CFL1     | DAZAP2  | CTBS     | EMR4P   | HIVEP2  | MARCKSL1 | MBP     | MMP15   |
| CXCL1    | CYTH1    | DAXX    | DGKH     | DLL4    | DPYD    | ERBB3    | F11R    | FAM27A  |
| CRTC3    | CSF2     | KLRC1   | FUT4     | ICAM2   | IL32    | LAMP2    | LILRB5  | KLRG1   |
| HAL      | C1orf183 | FFAR2   | MAK      | CXCR1   | STEAP4  | MGAM     | BTNL8   | CXCR2   |
| NUCB2    | OFD1     | OGT     | PDIA4    | SERTAD2 | SIRPA   | TMED2    | ENG     | FCAR    |

|          |          |         |          |         |          |          |          |          |
|----------|----------|---------|----------|---------|----------|----------|----------|----------|
| CR2      | TCL1A    | AKNA    | ARHGAP21 | CCL21   | CD27     | CD38     | CLEC17A  | CLEC9A   |
| KNTC1    | NUF2     | PRC1    | PSAT1    | RGS1    | RTKN2    | SAMSN1   | SELL     | TRAT1    |
| GZMH     | GZMK     | IL2RB   | LCK      | MPZL1   | NKG7     | PIK3IP1  | PTRH2    | TIMM13   |
| ITGB2    | KLF5     | LSP1    | NDUFB9   | PKM2    | SFXN3    | SIRPG    | SMAD4    | STX4     |
| SIGLEC1  | TNFRSF11 | TOX4    | UBA52    | ULBP1   |          |          |          |          |
| SDPR     | SIGLEC14 | SIGLEC6 | TAL1     | TFEC    | TIPIN    | TPK1     | UQCRB    | USP9Y    |
| HLA-DPA1 | HLA-DPB1 | IFI16   | LIME1    | LTK     | NFKBIA   | SETD7    | SIK1     | TRIB2    |
| LAMC1    | LCORL    | LMNB1   | MEIS3P1  | MPL     | FABP1    | FABP5    | FADD     | MFAP3L   |
| STAP1    | TAGAP    | ZCCHC2  |          |         |          |          |          |          |
| PRSS23   | PTGIR    | ST8SIA4 | STAB1    |         |          |          |          |          |
| DPP4     | LRRC32   | MC5R    | MICA     | NCAM1   | NCR2     | NRP1     | PDCD1LG2 | PDCD6    |
| CD7      | CD96     | CFHR3   | CHRM3    | CLEC7A  | COL23A1  | COL4A4   | COL5A3   | DAB1     |
| ABCA1    | ABCB1    | ADAMTS1 | ANK1     | ANKRD22 | B3GALT2  | CAMTA1   | CCR9     | CD40     |
| TMPRSS3  | GATA3    | BIRC5   | CDC25C   | CDC7    | CENPF    | CXCR6    | DHFR     | EVI5     |
| SRA1     | TNFRSF6B | TREM1   | TREML1   | RHOA    | SLC25A37 | TNFSF14  | TREML4   | VNN2     |
| COX7A2L  | CREB3L4  | CSF1    | CSNK2A2  | CSTA    | CSTB     | CTPS     | CTSD     | FST      |
| EMR3     |          |         |          |         |          |          |          |          |
| RAB38    | PLAU     | CSF3R   | SLC18A2  | AMPD2   | CLTB     | C1orf162 |          |          |
| MS4A2    | BASP1    | IGSF6   | HK3      | VNN1    | FES      | NPL      | FZD2     | FAM198B  |
| PILRA    |          |         |          |         |          |          |          |          |
| PTGER2   | PTGES2   | S100A8  | S100A9   |         |          |          |          |          |
| PNPLA6   | TMBIM6   | PQBP1   | TEX264   | IKZF1   |          |          |          |          |
| FAM49A   | FASLG    | FCGR1A  | FN1      | FSTL1   | FUCA1    | GBP3     | GLS2     | GRB2     |
| HSPA4    | HSPB6    | ISM2    | ITIH2    | KDM4C   | KIR2DS4  | KIRREL3  | SDCBP    | NFATC2IP |
| TNFRSF10 | VNN3     |         |          |         |          |          |          |          |
| IGF1     | ITGA2B   | GABARAP | GPX1     | KRT23   | PROK2    | RALB     | RETNLB   | RNF141   |

CLECL1

ZAP70

TRADD VIM XRCC6

WIPF1 ZCRB1

MINPP1 RPS24 RPS7 RPS9 DBNL CCL13

PRDX1 RAE1 RAET1E SIGLEC7 SIGLEC9 TYRO3 CHST12 CLIC3 IVNS1ABP

DLEU7 DOC2B EMP1 F12 FURIN GAB3 GATM GFPT2 GPR25

GPR44 IFT80

GSTA4 HELLS IL26 LAIR2

XPO6 CLEC4C TNFAIP2 UBD ACTR3 RAB1A SLA HLA-DQA:SIGLEC5

GATA2 GMPR HDC HEY1 HOXA1 HS2ST1 HS3ST1 BCL11B CDH3

HNMT SLC15A3 CD4 TXNDC3 FRMD4A CRYBB1 HRH1 WNT5B

LST1 BCL2 CDC5L FGF18 FUT5 FZR1 GAGE2 IGFBP5 KANK2

MICB KIR2DL1 KIR2DL3 KIR3DL1 KIR3DL2 NCR1 FOSL1 TSLP SLC7A7

SEC14L1 SEPX1 EMP3 CD300LF ABTB1 KLHL21 PHRF1



KIR2DL2 LGMN  
GREM2 HAVCR1 HSD11B1 HUNK IGF2 RCSD1 RYR1 SAV1 SELE

SLAMF9  
MYL6B NAA16 CIQA CIQB CYP27B1 EIF3M

LDB3  
SPP1 TREM2 UBASH3A YBX2 CCDC88A CLEC1A THBD PDPN VCAM1

SELP SH3KBP1 SIT1 SLC35B3 SIGLEC10 SKAP1 THUMPD2 TIGIT ZEB2

EMR1

ENC1    FAM134B FBXO30

**Table S3.1297 DEGs identified between two subtypes in the meta-GEO primary cohort.**

| row.names   | (t logFC | AveExpr  | t        | P.Value  | adj.P.Val | B        |
|-------------|----------|----------|----------|----------|-----------|----------|
| LGALS1      | -1.05437 | 11.54113 | -20.5639 | 5.69E-72 | 1.34E-67  | 153.0872 |
| RAB31       | -1.24272 | 9.484076 | -20.2211 | 3.74E-70 | 4.40E-66  | 148.9335 |
| GAS1        | -1.30577 | 5.579589 | -20.036  | 3.57E-69 | 2.80E-65  | 146.6962 |
| DENND5A     | -1.02702 | 8.087314 | -20.0054 | 5.18E-69 | 3.05E-65  | 146.3263 |
| GFPT2       | -1.2794  | 5.83239  | -19.5614 | 1.14E-66 | 5.34E-63  | 140.9799 |
| FRMD6       | -1.43443 | 7.998776 | -18.7166 | 2.98E-62 | 1.17E-58  | 130.8856 |
| FN1         | -1.46673 | 11.32631 | -18.6964 | 3.79E-62 | 1.27E-58  | 130.646  |
| TUBA1A      | -0.99771 | 11.04417 | -18.227  | 1.03E-59 | 3.01E-56  | 125.0909 |
| DPYSL3      | -1.61135 | 6.568015 | -18.2156 | 1.17E-59 | 3.07E-56  | 124.956  |
| TUBB6       | -1.20336 | 9.349039 | -18.1407 | 2.86E-59 | 6.72E-56  | 124.0742 |
| PTRF        | -1.06923 | 7.439917 | -18.0763 | 6.13E-59 | 1.23E-55  | 123.3164 |
| PRRX1       | -1.22962 | 5.473536 | -18.0743 | 6.28E-59 | 1.23E-55  | 123.2925 |
| SPOCK1      | -1.94496 | 6.971497 | -18.026  | 1.11E-58 | 2.02E-55  | 122.7245 |
| FAP         | -1.64033 | 7.374816 | -17.9711 | 2.13E-58 | 3.58E-55  | 122.0803 |
| C1R         | -1.25136 | 9.518822 | -17.8555 | 8.37E-58 | 1.31E-54  | 120.7238 |
| EFEMP2      | -1.02105 | 7.629937 | -17.808  | 1.47E-57 | 2.16E-54  | 120.1678 |
| SPARC       | -1.0726  | 10.69433 | -17.6902 | 5.88E-57 | 8.14E-54  | 118.7899 |
| CDH11       | -1.22803 | 6.999138 | -17.6777 | 6.81E-57 | 8.90E-54  | 118.6438 |
| IFFO1       | -0.65911 | 6.579754 | -17.6614 | 8.25E-57 | 1.02E-53  | 118.4537 |
| C1orf54     | -0.88634 | 8.989083 | -17.6393 | 1.07E-56 | 1.26E-53  | 118.1961 |
| SERPING1    | -1.27945 | 8.770828 | -17.63   | 1.19E-56 | 1.34E-53  | 118.0877 |
| LOC1001328  | -0.9884  | 4.965919 | -17.555  | 2.88E-56 | 2.98E-53  | 117.2131 |
| IQCJ-SCHIP1 | -1.30368 | 6.295111 | -17.5542 | 2.91E-56 | 2.98E-53  | 117.2028 |
| PCOLCE      | -1.18205 | 8.185896 | -17.4934 | 5.95E-56 | 5.83E-53  | 116.4949 |
| NID2        | -1.17218 | 8.074956 | -17.4585 | 8.95E-56 | 8.42E-53  | 116.0892 |
| VEGFC       | -0.95626 | 6.165329 | -17.4369 | 1.15E-55 | 1.04E-52  | 115.8377 |
| BGN         | -1.2139  | 8.006188 | -17.378  | 2.30E-55 | 2.00E-52  | 115.1533 |
| PKD2        | -1.12448 | 7.487499 | -17.2876 | 6.62E-55 | 5.56E-52  | 114.104  |
| OLFML2B     | -1.20814 | 7.229852 | -17.2813 | 7.12E-55 | 5.78E-52  | 114.0316 |
| CSGALNACT   | -0.84567 | 7.932547 | -17.2026 | 1.79E-54 | 1.40E-51  | 113.1195 |
| PLEKHO1     | -1.01768 | 7.498816 | -17.1542 | 3.14E-54 | 2.38E-51  | 112.5597 |
| GUCY1B3     | -1.25335 | 7.204476 | -17.0895 | 6.68E-54 | 4.91E-51  | 111.8119 |
| DDR2        | -1.25757 | 6.881485 | -17.0499 | 1.06E-53 | 7.54E-51  | 111.3552 |
| STON1       | -0.96609 | 5.252641 | -17.0445 | 1.13E-53 | 7.79E-51  | 111.2931 |
| COL6A2      | -0.93405 | 7.160881 | -16.9979 | 1.94E-53 | 1.30E-50  | 110.756  |
| RILPL1      | -0.71075 | 6.715364 | -16.9945 | 2.01E-53 | 1.32E-50  | 110.7164 |
| ANGPTL2     | -1.0497  | 7.021413 | -16.927  | 4.41E-53 | 2.74E-50  | 109.9391 |
| BNIP2       | -0.70619 | 8.070104 | -16.9267 | 4.43E-53 | 2.74E-50  | 109.9353 |
| MSRB3       | -1.33514 | 6.419154 | -16.9032 | 5.81E-53 | 3.50E-50  | 109.6658 |
| TSHZ3       | -0.98621 | 6.165724 | -16.8727 | 8.28E-53 | 4.87E-50  | 109.3149 |
| L3HYPDH     | -0.71247 | 5.406064 | -16.8467 | 1.12E-52 | 6.42E-50  | 109.0159 |
| VGLL3       | -1.24527 | 5.021221 | -16.8333 | 1.31E-52 | 7.31E-50  | 108.8627 |
| FERMT2      | -1.24031 | 7.118974 | -16.8098 | 1.71E-52 | 9.37E-50  | 108.5928 |
| WISP1       | -1.03742 | 5.377498 | -16.7615 | 3.00E-52 | 1.57E-49  | 108.0383 |
| LOC1019289  | -1.33501 | 9.636889 | -16.7562 | 3.19E-52 | 1.63E-49  | 107.9776 |
| CHN1        | -0.98504 | 7.96566  | -16.7471 | 3.54E-52 | 1.77E-49  | 107.8732 |
| EDNRA       | -1.27581 | 6.138628 | -16.7408 | 3.81E-52 | 1.87E-49  | 107.8007 |
| PPP1R18     | -0.77299 | 8.21565  | -16.6876 | 7.04E-52 | 3.38E-49  | 107.1914 |
| CTSL        | -0.84602 | 9.850144 | -16.6776 | 7.90E-52 | 3.72E-49  | 107.0775 |
| QKI         | -0.72003 | 6.263108 | -16.6402 | 1.22E-51 | 5.61E-49  | 106.6494 |
| RHOQ        | -0.74697 | 8.269578 | -16.6298 | 1.37E-51 | 6.08E-49  | 106.5307 |
| TIMP2       | -1.17398 | 9.923711 | -16.6143 | 1.64E-51 | 7.14E-49  | 106.3527 |
| CLMP        | -1.40783 | 6.202792 | -16.5963 | 2.02E-51 | 8.63E-49  | 106.1473 |
| COL6A3      | -1.09498 | 11.38951 | -16.5784 | 2.48E-51 | 1.04E-48  | 105.9433 |
| KATNAL1     | -0.6772  | 5.405013 | -16.5492 | 3.47E-51 | 1.43E-48  | 105.6097 |
| GLI3        | -0.93738 | 5.884883 | -16.5434 | 3.71E-51 | 1.50E-48  | 105.5431 |

|              |          |          |          |          |          |          |
|--------------|----------|----------|----------|----------|----------|----------|
| COLEC12      | -1.54301 | 6.445486 | -16.4249 | 1.45E-50 | 5.77E-48 | 104.1934 |
| MXRA7        | -1.03312 | 7.103905 | -16.4031 | 1.86E-50 | 7.28E-48 | 103.9455 |
| FBN1         | -1.27125 | 7.501857 | -16.3979 | 1.97E-50 | 7.61E-48 | 103.886  |
| FBXL7        | -0.94027 | 6.146044 | -16.3964 | 2.01E-50 | 7.61E-48 | 103.869  |
| FSTL1        | -0.89745 | 7.785203 | -16.3937 | 2.07E-50 | 7.72E-48 | 103.8389 |
| 11-Sep       | -0.81477 | 6.234943 | -16.3923 | 2.10E-50 | 7.73E-48 | 103.8221 |
| TTC7B        | -0.99092 | 6.056436 | -16.3495 | 3.43E-50 | 1.24E-47 | 103.3366 |
| FNDC1        | -2.03331 | 6.589932 | -16.3469 | 3.54E-50 | 1.26E-47 | 103.3064 |
| GLIPR1       | -1.10023 | 7.180956 | -16.2432 | 1.16E-49 | 4.06E-47 | 102.1306 |
| THY1         | -0.95371 | 8.110134 | -16.1962 | 1.98E-49 | 6.85E-47 | 101.598  |
| CCL2         | -1.44602 | 8.524403 | -16.1823 | 2.32E-49 | 7.80E-47 | 101.4412 |
| COL1A2       | -1.10533 | 12.10624 | -16.1578 | 3.07E-49 | 1.00E-46 | 101.1637 |
| KLHL5        | -1.0757  | 6.741995 | -16.1554 | 3.15E-49 | 1.02E-46 | 101.1372 |
| LOC1009966   | -1.0686  | 6.108948 | -16.1248 | 4.47E-49 | 1.42E-46 | 100.7909 |
| FLNA         | -1.12218 | 8.314412 | -16.1106 | 5.26E-49 | 1.65E-46 | 100.6305 |
| ZEB2         | -0.91594 | 4.606018 | -16.1033 | 5.71E-49 | 1.74E-46 | 100.5483 |
| AKR7A3       | 1.120237 | 8.640767 | 16.09969 | 5.95E-49 | 1.79E-46 | 100.5076 |
| BNC2         | -1.11426 | 5.32323  | -16.0828 | 7.21E-49 | 2.15E-46 | 100.3169 |
| SULF1        | -1.57523 | 9.042187 | -16.0794 | 7.49E-49 | 2.20E-46 | 100.2791 |
| HSD11B1      | -1.33859 | 6.188894 | -16.0736 | 8.00E-49 | 2.32E-46 | 100.2138 |
| PDGFRB       | -0.8536  | 7.583103 | -16.0717 | 8.18E-49 | 2.35E-46 | 100.192  |
| AEBP1        | -1.179   | 8.675965 | -16.0701 | 8.33E-49 | 2.36E-46 | 100.1733 |
| TSPAN4       | -0.74162 | 7.249444 | -16.0597 | 9.38E-49 | 2.63E-46 | 100.0562 |
| COL15A1      | -1.18795 | 9.646945 | -16.0462 | 1.09E-48 | 3.02E-46 | 99.90468 |
| C1S          | -1.29877 | 8.688807 | -16.0431 | 1.13E-48 | 3.10E-46 | 99.86971 |
| COL3A1       | -1.04558 | 11.77623 | -16.0399 | 1.17E-48 | 3.18E-46 | 99.83296 |
| AKAP2 /// P/ | -0.86555 | 8.464672 | -15.995  | 1.95E-48 | 5.17E-46 | 99.32779 |
| KCNJ8        | -1.08093 | 6.360664 | -15.984  | 2.22E-48 | 5.79E-46 | 99.20381 |
| TRPC1        | -1.24426 | 5.085442 | -15.9174 | 4.71E-48 | 1.21E-45 | 98.45485 |
| MPDZ         | -1.1276  | 6.79968  | -15.8721 | 7.88E-48 | 1.99E-45 | 97.94597 |
| GLIPR2       | -0.99585 | 6.830225 | -15.863  | 8.73E-48 | 2.18E-45 | 97.8439  |
| ENOX1        | -0.75254 | 5.033657 | -15.8591 | 9.13E-48 | 2.26E-45 | 97.79973 |
| CMTM3        | -0.64954 | 7.056884 | -15.8577 | 9.27E-48 | 2.27E-45 | 97.78415 |
| KIAA1462     | -0.93229 | 5.063384 | -15.8223 | 1.38E-47 | 3.35E-45 | 97.38743 |
| MAFB         | -0.96819 | 8.616661 | -15.8044 | 1.69E-47 | 4.06E-45 | 97.18671 |
| ZFPM2        | -1.55184 | 5.224875 | -15.7995 | 1.79E-47 | 4.25E-45 | 97.13209 |
| GLT8D2       | -1.21352 | 7.104922 | -15.7967 | 1.85E-47 | 4.34E-45 | 97.10072 |
| HEG1         | -0.75378 | 8.076049 | -15.7744 | 2.38E-47 | 5.53E-45 | 96.85111 |
| SFRP2        | -2.3025  | 7.699841 | -15.704  | 5.26E-47 | 1.21E-44 | 96.06378 |
| CHST11       | -0.77433 | 6.69516  | -15.6949 | 5.83E-47 | 1.33E-44 | 95.96165 |
| THBS2        | -1.71968 | 8.52545  | -15.628  | 1.24E-46 | 2.80E-44 | 95.21534 |
| CDS1         | 0.978012 | 7.885184 | 15.61516 | 1.43E-46 | 3.20E-44 | 95.07242 |
| GUCY1A3      | -1.4775  | 7.839373 | -15.5933 | 1.83E-46 | 4.05E-44 | 94.82912 |
| PDGFRL       | -1.36115 | 5.767957 | -15.5828 | 2.06E-46 | 4.52E-44 | 94.7116  |
| VIM          | -0.73921 | 8.042972 | -15.5387 | 3.37E-46 | 7.34E-44 | 94.22102 |
| CD248        | -0.73476 | 7.932053 | -15.5223 | 4.05E-46 | 8.74E-44 | 94.03866 |
| TIMP3        | -1.01026 | 7.682337 | -15.5105 | 4.62E-46 | 9.88E-44 | 93.90787 |
| COL8A2       | -0.88296 | 5.880742 | -15.5054 | 4.89E-46 | 1.04E-43 | 93.85124 |
| UBE2E2       | -0.98886 | 8.066138 | -15.4216 | 1.25E-45 | 2.58E-43 | 92.92154 |
| CCDC80       | -1.44358 | 6.72709  | -15.4082 | 1.45E-45 | 2.97E-43 | 92.77244 |
| SLC2A14 ///  | -1.01655 | 7.09355  | -15.3964 | 1.66E-45 | 3.36E-43 | 92.64207 |
| PRKD1        | -0.58937 | 4.093267 | -15.386  | 1.86E-45 | 3.74E-43 | 92.52612 |
| EMP3         | -0.83415 | 7.494902 | -15.3671 | 2.30E-45 | 4.54E-43 | 92.31777 |
| CHSY3        | -0.80066 | 5.383848 | -15.3606 | 2.47E-45 | 4.84E-43 | 92.2453  |
| ZNF532       | -0.72738 | 7.38795  | -15.3553 | 2.62E-45 | 5.10E-43 | 92.18632 |
| MIR100HG     | -1.93297 | 5.952065 | -15.3341 | 3.32E-45 | 6.40E-43 | 91.95252 |
| NEXN         | -1.64817 | 7.417413 | -15.3278 | 3.56E-45 | 6.81E-43 | 91.88299 |
| CTHRC1       | -1.43551 | 9.884483 | -15.3184 | 3.96E-45 | 7.51E-43 | 91.77846 |

|              |          |          |          |          |          |          |
|--------------|----------|----------|----------|----------|----------|----------|
| LINC01279    | -2.09821 | 6.317457 | -15.3134 | 4.18E-45 | 7.87E-43 | 91.72342 |
| GADD45B      | -0.77898 | 7.385608 | -15.312  | 4.25E-45 | 7.93E-43 | 91.70781 |
| BICC1        | -0.76398 | 5.270124 | -15.3053 | 4.58E-45 | 8.48E-43 | 91.63367 |
| VCAN         | -1.17163 | 8.326498 | -15.3027 | 4.72E-45 | 8.66E-43 | 91.60501 |
| GPR124       | -0.76935 | 6.903819 | -15.255  | 8.02E-45 | 1.46E-42 | 91.07881 |
| DNM3OS       | -0.90584 | 4.615023 | -15.2265 | 1.10E-44 | 1.99E-42 | 90.76406 |
| SNAI2        | -1.26539 | 7.212745 | -15.2244 | 1.13E-44 | 2.02E-42 | 90.74159 |
| TIMP1        | -0.83463 | 11.5884  | -15.2201 | 1.18E-44 | 2.11E-42 | 90.69341 |
| GXYLT2       | -1.17049 | 5.816694 | -15.209  | 1.34E-44 | 2.36E-42 | 90.57182 |
| IGFBP7       | -0.72759 | 11.83831 | -15.1973 | 1.52E-44 | 2.67E-42 | 90.4432  |
| CNRIP1       | -1.02762 | 7.620476 | -15.1919 | 1.62E-44 | 2.82E-42 | 90.38333 |
| AXL          | -0.60532 | 6.964316 | -15.1833 | 1.78E-44 | 3.08E-42 | 90.28894 |
| CAV1         | -1.21316 | 9.614808 | -15.1644 | 2.19E-44 | 3.76E-42 | 90.08115 |
| PLXDC2       | -1.05071 | 6.284374 | -15.1582 | 2.35E-44 | 4.01E-42 | 90.01228 |
| C1orf216     | -0.63656 | 7.199903 | -15.1436 | 2.76E-44 | 4.67E-42 | 89.8521  |
| COL5A2       | -1.06411 | 9.629572 | -15.1369 | 2.98E-44 | 5.00E-42 | 89.77803 |
| COX7A1       | -1.08723 | 7.721858 | -15.126  | 3.36E-44 | 5.60E-42 | 89.65863 |
| TMEM125      | 1.003453 | 8.206817 | 15.12456 | 3.41E-44 | 5.65E-42 | 89.64259 |
| ISLR         | -1.21572 | 6.708025 | -15.1135 | 3.86E-44 | 6.35E-42 | 89.52066 |
| ST6GALNAC1   | -1.07743 | 5.20302  | -15.0904 | 4.98E-44 | 8.14E-42 | 89.2677  |
| TM6SF1       | -0.99502 | 5.697476 | -15.0703 | 6.23E-44 | 1.01E-41 | 89.04634 |
| ATP8B2       | -0.66771 | 6.872237 | -15.0561 | 7.28E-44 | 1.17E-41 | 88.89111 |
| CEP170 /// C | -0.69598 | 7.814077 | -15.0464 | 8.11E-44 | 1.30E-41 | 88.78479 |
| SERPINF1     | -1.28078 | 9.095437 | -15.0298 | 9.74E-44 | 1.55E-41 | 88.60331 |
| PPP1R12A     | -0.64564 | 8.317365 | -15.0046 | 1.29E-43 | 2.03E-41 | 88.32646 |
| LRCH2        | -1.0387  | 4.654329 | -15.0025 | 1.32E-43 | 2.07E-41 | 88.30371 |
| CFL2         | -1.3683  | 7.782936 | -14.9859 | 1.58E-43 | 2.46E-41 | 88.12207 |
| SYT11        | -0.84982 | 5.346986 | -14.9731 | 1.82E-43 | 2.82E-41 | 87.98207 |
| COL4A2       | -0.85707 | 9.195839 | -14.9626 | 2.05E-43 | 3.11E-41 | 87.867   |
| CLIC4        | -0.88834 | 7.203362 | -14.9624 | 2.05E-43 | 3.11E-41 | 87.86459 |
| MEOX2        | -0.84182 | 3.437699 | -14.9511 | 2.32E-43 | 3.50E-41 | 87.74172 |
| CLEC2B       | -0.91342 | 6.553806 | -14.9504 | 2.34E-43 | 3.51E-41 | 87.7339  |
| NUAK1        | -0.84245 | 7.690177 | -14.9353 | 2.76E-43 | 4.09E-41 | 87.56898 |
| CDC42EP3     | -1.13381 | 7.261306 | -14.9097 | 3.66E-43 | 5.38E-41 | 87.28966 |
| EMILIN1      | -0.98501 | 7.060477 | -14.8925 | 4.43E-43 | 6.47E-41 | 87.10112 |
| INHBA        | -1.44778 | 7.299709 | -14.8905 | 4.53E-43 | 6.58E-41 | 87.07934 |
| ITPKA        | 0.766158 | 6.145903 | 14.88633 | 4.74E-43 | 6.84E-41 | 87.03436 |
| COL4A1       | -0.85714 | 9.941494 | -14.88   | 5.08E-43 | 7.29E-41 | 86.96496 |
| ZNF423       | -1.14486 | 6.151163 | -14.8552 | 6.68E-43 | 9.46E-41 | 86.69462 |
| COL5A1       | -1.02336 | 8.226434 | -14.7568 | 1.97E-42 | 2.75E-40 | 85.62425 |
| AP1S2        | -0.79779 | 7.931998 | -14.7394 | 2.38E-42 | 3.31E-40 | 85.43492 |
| PHC1         | -0.62246 | 6.483946 | -14.738  | 2.42E-42 | 3.34E-40 | 85.42014 |
| RAB23        | -1.32786 | 7.068015 | -14.7356 | 2.48E-42 | 3.41E-40 | 85.39397 |
| TCF4         | -0.8423  | 8.223855 | -14.7312 | 2.60E-42 | 3.56E-40 | 85.34594 |
| PDE3A        | -0.75042 | 5.559547 | -14.7183 | 3.00E-42 | 4.07E-40 | 85.20652 |
| SLC2A3       | -1.00795 | 7.432676 | -14.7131 | 3.17E-42 | 4.29E-40 | 85.14973 |
| RAI14        | -0.77165 | 8.9015   | -14.6981 | 3.74E-42 | 5.02E-40 | 84.98688 |
| SLIT2        | -1.45845 | 5.422708 | -14.6868 | 4.23E-42 | 5.65E-40 | 84.8644  |
| TAGLN        | -1.49544 | 9.888241 | -14.6733 | 4.90E-42 | 6.51E-40 | 84.71827 |
| GLIS2        | -0.905   | 7.296452 | -14.6698 | 5.09E-42 | 6.73E-40 | 84.68065 |
| NOX4         | -0.72007 | 4.05815  | -14.6394 | 7.10E-42 | 9.28E-40 | 84.35091 |
| MYH10        | -1.16993 | 7.364586 | -14.5992 | 1.10E-41 | 1.42E-39 | 83.9169  |
| GLYR1 /// SE | -1.0484  | 7.451403 | -14.5966 | 1.13E-41 | 1.45E-39 | 83.88891 |
| ZNF25        | -0.69983 | 6.027678 | -14.5932 | 1.17E-41 | 1.50E-39 | 83.85201 |
| GYPC         | -0.75751 | 7.841449 | -14.5522 | 1.84E-41 | 2.33E-39 | 83.40915 |
| SH3BP5       | -0.75955 | 8.065086 | -14.5139 | 2.79E-41 | 3.52E-39 | 82.99576 |
| RBMS1        | -0.80945 | 8.680206 | -14.4811 | 3.98E-41 | 5.00E-39 | 82.64313 |
| AK021804     | -1.4296  | 5.233368 | -14.4609 | 4.96E-41 | 6.20E-39 | 82.4251  |

|              |          |          |          |          |          |          |
|--------------|----------|----------|----------|----------|----------|----------|
| RP3-428L16.  | -1.39753 | 5.983611 | -14.4564 | 5.20E-41 | 6.47E-39 | 82.37749 |
| SYNC         | -1.59183 | 5.958037 | -14.4536 | 5.36E-41 | 6.64E-39 | 82.34742 |
| KDF1         | 0.610362 | 6.136994 | 14.45186 | 5.47E-41 | 6.73E-39 | 82.32821 |
| MXRA8        | -0.74292 | 8.000349 | -14.4157 | 8.09E-41 | 9.86E-39 | 81.93921 |
| CTSK         | -1.12103 | 9.653217 | -14.413  | 8.33E-41 | 1.01E-38 | 81.9103  |
| MRC1         | -1.2874  | 7.97225  | -14.4065 | 8.93E-41 | 1.08E-38 | 81.84125 |
| MAP1B        | -1.24755 | 7.240814 | -14.4015 | 9.44E-41 | 1.13E-38 | 81.78684 |
| CD200        | -0.84241 | 6.216292 | -14.3992 | 9.67E-41 | 1.15E-38 | 81.7629  |
| LUM          | -1.02157 | 9.520957 | -14.387  | 1.10E-40 | 1.31E-38 | 81.63159 |
| TNFAIP6      | -1.42894 | 7.57278  | -14.3678 | 1.36E-40 | 1.60E-38 | 81.4261  |
| ITGAM        | -0.95024 | 6.445155 | -14.3599 | 1.48E-40 | 1.72E-38 | 81.34065 |
| FGF7 /// KGF | -1.40986 | 6.842679 | -14.3585 | 1.50E-40 | 1.74E-38 | 81.32573 |
| MN1          | -1.31763 | 5.903347 | -14.3438 | 1.76E-40 | 2.03E-38 | 81.16861 |
| CNN3         | -0.89262 | 9.274471 | -14.3194 | 2.29E-40 | 2.63E-38 | 80.90686 |
| TGFB111      | -1.15916 | 8.780404 | -14.3114 | 2.50E-40 | 2.85E-38 | 80.82099 |
| COL8A1       | -0.92878 | 3.756028 | -14.2821 | 3.43E-40 | 3.90E-38 | 80.50799 |
| FIBIN        | -1.07013 | 6.377362 | -14.2762 | 3.66E-40 | 4.13E-38 | 80.44461 |
| CYP1B1       | -1.77459 | 6.871432 | -14.2433 | 5.21E-40 | 5.84E-38 | 80.09341 |
| MCAM         | -0.91764 | 8.245324 | -14.2283 | 6.12E-40 | 6.79E-38 | 79.93362 |
| RP11-96D1.1  | 0.833979 | 6.68851  | 14.22735 | 6.19E-40 | 6.83E-38 | 79.92322 |
| FXD6         | -1.05529 | 7.137136 | -14.2039 | 7.97E-40 | 8.76E-38 | 79.67264 |
| ASPN         | -1.65753 | 8.43101  | -14.1886 | 9.39E-40 | 1.03E-37 | 79.50987 |
| ITGA5        | -0.77786 | 7.24769  | -14.1758 | 1.08E-39 | 1.17E-37 | 79.37385 |
| PABPC4L      | -0.77233 | 4.322923 | -14.1737 | 1.10E-39 | 1.19E-37 | 79.35145 |
| EPN3         | 0.837299 | 6.384871 | 14.16449 | 1.22E-39 | 1.31E-37 | 79.25318 |
| COL12A1      | -1.25081 | 6.515092 | -14.1579 | 1.31E-39 | 1.40E-37 | 79.18306 |
| LRR32        | -0.74489 | 7.491991 | -14.1541 | 1.36E-39 | 1.45E-37 | 79.14217 |
| CALHM2       | -0.61222 | 6.69816  | -14.1466 | 1.47E-39 | 1.55E-37 | 79.06288 |
| DOK5         | -0.73851 | 5.751937 | -14.1254 | 1.85E-39 | 1.94E-37 | 78.83708 |
| LRRK2        | -0.99497 | 5.482142 | -14.1238 | 1.88E-39 | 1.97E-37 | 78.8202  |
| TWSG1        | -0.72583 | 8.254282 | -14.1159 | 2.05E-39 | 2.13E-37 | 78.73681 |
| LHFP         | -1.00524 | 7.334771 | -14.0935 | 2.61E-39 | 2.69E-37 | 78.49847 |
| PTPRM        | -0.73644 | 7.562902 | -14.0724 | 3.27E-39 | 3.35E-37 | 78.27427 |
| TGFBI        | -0.91222 | 10.52014 | -14.0705 | 3.33E-39 | 3.40E-37 | 78.2545  |
| TRIM6        | -0.94873 | 5.26682  | -14.0703 | 3.34E-39 | 3.40E-37 | 78.25228 |
| FGF2         | -0.87858 | 4.653662 | -14.0638 | 3.58E-39 | 3.63E-37 | 78.1831  |
| NDN          | -1.15022 | 7.231543 | -14.0223 | 5.58E-39 | 5.61E-37 | 77.74322 |
| OLFML1       | -0.97088 | 6.511911 | -13.9922 | 7.70E-39 | 7.67E-37 | 77.42432 |
| GPC6         | -0.83218 | 6.812974 | -13.9842 | 8.39E-39 | 8.29E-37 | 77.33993 |
| EFS          | -0.63639 | 5.586405 | -13.9779 | 8.97E-39 | 8.83E-37 | 77.27314 |
| MYL9         | -0.94653 | 6.84389  | -13.9753 | 9.22E-39 | 9.04E-37 | 77.24573 |
| MDFIC        | -0.89938 | 5.637341 | -13.9615 | 1.07E-38 | 1.04E-36 | 77.09965 |
| ITGA1        | -1.00995 | 5.587826 | -13.9518 | 1.18E-38 | 1.15E-36 | 76.99753 |
| PBX3         | -0.95996 | 7.949986 | -13.9317 | 1.47E-38 | 1.41E-36 | 76.78541 |
| PECAM1       | -0.84282 | 7.503368 | -13.9263 | 1.56E-38 | 1.49E-36 | 76.72781 |
| GAS7         | -0.69748 | 5.991373 | -13.9024 | 2.01E-38 | 1.92E-36 | 76.47551 |
| NQO1         | 1.140358 | 10.61627 | 13.88189 | 2.49E-38 | 2.38E-36 | 76.25979 |
| LOX          | -1.11084 | 5.329528 | -13.8671 | 2.92E-38 | 2.77E-36 | 76.10382 |
| FAM198B      | -0.82932 | 7.483209 | -13.8374 | 4.00E-38 | 3.78E-36 | 75.79176 |
| LDHD         | 0.587958 | 5.06732  | 13.79569 | 6.23E-38 | 5.81E-36 | 75.35305 |
| AP1M2        | 0.77471  | 7.466082 | 13.79078 | 6.56E-38 | 6.10E-36 | 75.3015  |
| ZNF521       | -1.08212 | 5.54008  | -13.7753 | 7.73E-38 | 7.13E-36 | 75.13867 |
| NAP1L3       | -1.4125  | 4.854049 | -13.7609 | 9.01E-38 | 8.24E-36 | 74.98776 |
| FCGR2C       | -0.79269 | 6.962903 | -13.7373 | 1.16E-37 | 1.05E-35 | 74.7405  |
| MCAM /// M   | -0.74753 | 8.097446 | -13.7177 | 1.42E-37 | 1.29E-35 | 74.53559 |
| CKMT1A ///   | 1.190971 | 8.999037 | 13.70657 | 1.60E-37 | 1.44E-35 | 74.41859 |
| VILL         | 1.179904 | 7.620538 | 13.70622 | 1.61E-37 | 1.44E-35 | 74.41496 |
| ITGBL1       | -1.45084 | 5.852397 | -13.6972 | 1.77E-37 | 1.58E-35 | 74.32063 |

|             |          |          |          |          |          |          |
|-------------|----------|----------|----------|----------|----------|----------|
| SMIM22      | 0.712474 | 8.797848 | 13.68559 | 2.00E-37 | 1.78E-35 | 74.1991  |
| C1orf210    | 0.824959 | 5.89147  | 13.67496 | 2.23E-37 | 1.98E-35 | 74.08796 |
| CYR61       | -1.09617 | 9.56428  | -13.6549 | 2.76E-37 | 2.44E-35 | 73.87836 |
| LOC1027252  | -0.99313 | 5.710568 | -13.6532 | 2.81E-37 | 2.47E-35 | 73.86063 |
| MRGPRF      | -1.44707 | 6.834754 | -13.6348 | 3.41E-37 | 2.99E-35 | 73.66887 |
| C5AR1       | -0.96408 | 6.651991 | -13.6322 | 3.50E-37 | 3.06E-35 | 73.64152 |
| RHOJ        | -0.71805 | 5.262857 | -13.6224 | 3.89E-37 | 3.37E-35 | 73.53877 |
| CA9         | 1.482432 | 6.955139 | 13.62202 | 3.90E-37 | 3.37E-35 | 73.53511 |
| FKBP1A-SDC  | 1.091081 | 9.154064 | 13.60854 | 4.50E-37 | 3.87E-35 | 73.39457 |
| DZIP1       | -0.90685 | 5.045329 | -13.5994 | 4.95E-37 | 4.25E-35 | 73.29894 |
| SELM        | -0.94347 | 9.082445 | -13.595  | 5.19E-37 | 4.44E-35 | 73.25289 |
| SLC9A3R1    | 0.629892 | 8.195602 | 13.58143 | 5.98E-37 | 5.10E-35 | 73.11198 |
| PKIG        | -0.84398 | 8.827096 | -13.5341 | 9.83E-37 | 8.31E-35 | 72.61991 |
| CCL28       | 1.094804 | 6.561435 | 13.52977 | 1.03E-36 | 8.67E-35 | 72.5745  |
| FBLN2       | -0.95    | 6.583428 | -13.5195 | 1.15E-36 | 9.63E-35 | 72.46729 |
| ATP2B4      | -0.85384 | 8.221492 | -13.5183 | 1.16E-36 | 9.71E-35 | 72.45579 |
| ZNF667-AS1  | -1.0323  | 5.563642 | -13.5146 | 1.21E-36 | 1.00E-34 | 72.41682 |
| AKR1C3      | 1.423113 | 10.79624 | 13.50491 | 1.34E-36 | 1.11E-34 | 72.3162  |
| S1PR3       | -0.62173 | 6.329263 | -13.5034 | 1.36E-36 | 1.12E-34 | 72.30094 |
| FAM83E      | 0.66174  | 6.156714 | 13.50156 | 1.38E-36 | 1.13E-34 | 72.28144 |
| PALLD       | -1.01353 | 9.335242 | -13.4858 | 1.63E-36 | 1.33E-34 | 72.11775 |
| TWIST1      | -1.30876 | 5.738924 | -13.4841 | 1.66E-36 | 1.35E-34 | 72.10065 |
| ENTPD1      | -0.76642 | 6.703045 | -13.4838 | 1.67E-36 | 1.35E-34 | 72.09758 |
| FCGR2B      | -1.11111 | 6.700634 | -13.4809 | 1.72E-36 | 1.38E-34 | 72.06696 |
| CD14        | -0.92459 | 8.751403 | -13.476  | 1.81E-36 | 1.45E-34 | 72.01586 |
| COL1A1      | -1.04405 | 8.080171 | -13.4662 | 2.00E-36 | 1.59E-34 | 71.91478 |
| C1orf162    | -0.89015 | 7.163158 | -13.4584 | 2.17E-36 | 1.72E-34 | 71.83336 |
| PEG3        | -1.18948 | 4.163299 | -13.446  | 2.48E-36 | 1.95E-34 | 71.70482 |
| ROR2        | -0.89452 | 5.059957 | -13.4402 | 2.63E-36 | 2.07E-34 | 71.64559 |
| LOC1019297  | -0.83165 | 5.695609 | -13.4375 | 2.70E-36 | 2.12E-34 | 71.61741 |
| NXN         | -0.98668 | 9.230482 | -13.4291 | 2.95E-36 | 2.30E-34 | 71.52989 |
| GREM1       | -1.90196 | 9.665586 | -13.429  | 2.96E-36 | 2.30E-34 | 71.52883 |
| DNAJB4      | -0.7277  | 6.893335 | -13.4273 | 3.01E-36 | 2.33E-34 | 71.51209 |
| RNF150      | -1.09074 | 4.791573 | -13.4138 | 3.46E-36 | 2.68E-34 | 71.37207 |
| THBS4       | -1.68767 | 7.380889 | -13.4123 | 3.52E-36 | 2.71E-34 | 71.35654 |
| RAB17       | 0.635032 | 6.951466 | 13.38051 | 4.90E-36 | 3.75E-34 | 71.02775 |
| TCEAL7      | -1.33186 | 5.49272  | -13.3703 | 5.45E-36 | 4.14E-34 | 70.92267 |
| EHD2        | -0.70242 | 7.215775 | -13.3581 | 6.19E-36 | 4.67E-34 | 70.79648 |
| PRICKLE2    | -1.07067 | 6.113459 | -13.3576 | 6.23E-36 | 4.68E-34 | 70.79077 |
| CPXM1       | -0.94482 | 5.973032 | -13.3514 | 6.64E-36 | 4.97E-34 | 70.72762 |
| MAGI2-AS3   | -0.81494 | 4.018933 | -13.3391 | 7.55E-36 | 5.64E-34 | 70.60015 |
| CXCL12      | -1.29796 | 7.265525 | -13.3269 | 8.57E-36 | 6.38E-34 | 70.47475 |
| ZCCHC24     | -1.06205 | 7.79498  | -13.3229 | 8.94E-36 | 6.63E-34 | 70.43274 |
| ISM1        | -0.73025 | 3.995723 | -13.3183 | 9.37E-36 | 6.93E-34 | 70.38612 |
| ECSCR       | -0.72229 | 7.00606  | -13.3084 | 1.04E-35 | 7.66E-34 | 70.28375 |
| LOC283278 / | 0.736695 | 6.991121 | 13.30609 | 1.06E-35 | 7.82E-34 | 70.25996 |
| TNS1        | -0.8497  | 6.720729 | -13.3038 | 1.09E-35 | 7.98E-34 | 70.23667 |
| GPM6B       | -1.18797 | 5.039672 | -13.3022 | 1.11E-35 | 8.09E-34 | 70.22036 |
| CRYAB       | -1.29709 | 7.261024 | -13.3013 | 1.12E-35 | 8.14E-34 | 70.21114 |
| CD93        | -0.77357 | 8.491065 | -13.2701 | 1.55E-35 | 1.12E-33 | 69.88982 |
| GABARAPL1   | -0.63729 | 7.048722 | -13.2677 | 1.59E-35 | 1.14E-33 | 69.86445 |
| ELTD1       | -0.84374 | 8.047815 | -13.2666 | 1.60E-35 | 1.15E-33 | 69.85376 |
| OMD         | -1.43434 | 4.606676 | -13.2592 | 1.73E-35 | 1.24E-33 | 69.77708 |
| C8orf88     | -1.20335 | 4.840044 | -13.2585 | 1.74E-35 | 1.25E-33 | 69.77076 |
| CRISPLD1    | -1.55736 | 6.024099 | -13.2489 | 1.93E-35 | 1.37E-33 | 69.67201 |
| AOC3        | -1.376   | 7.270323 | -13.2445 | 2.02E-35 | 1.43E-33 | 69.62678 |
| HDGFRP3     | -0.99758 | 5.670797 | -13.2032 | 3.09E-35 | 2.19E-33 | 69.20263 |
| C4orf19     | 1.135537 | 7.204606 | 13.18052 | 3.91E-35 | 2.76E-33 | 68.97    |



|              |          |          |          |          |          |          |
|--------------|----------|----------|----------|----------|----------|----------|
| PRSS8        | 1.168462 | 8.145942 | 13.15963 | 4.86E-35 | 3.40E-33 | 68.75604 |
| FRK          | 0.845936 | 6.497445 | 13.15264 | 5.22E-35 | 3.64E-33 | 68.68455 |
| EML1         | -1.21455 | 6.268703 | -13.148  | 5.48E-35 | 3.79E-33 | 68.63707 |
| HSPB2        | -0.60734 | 5.620057 | -13.1471 | 5.53E-35 | 3.81E-33 | 68.62828 |
| VSIG2        | 1.436733 | 7.603207 | 13.14653 | 5.56E-35 | 3.82E-33 | 68.62202 |
| C3AR1        | -0.78828 | 8.107091 | -13.1422 | 5.82E-35 | 3.99E-33 | 68.57725 |
| LOC1002890   | 0.777466 | 7.456844 | 13.12834 | 6.71E-35 | 4.59E-33 | 68.43594 |
| RARRES2      | -0.92493 | 8.909361 | -13.123  | 7.09E-35 | 4.84E-33 | 68.3812  |
| ELOVL6       | 1.014383 | 6.591078 | 13.09358 | 9.61E-35 | 6.47E-33 | 68.08088 |
| CTGF         | -0.9453  | 10.36868 | -13.0902 | 9.95E-35 | 6.68E-33 | 68.04614 |
| C11orf96     | -0.96977 | 10.28078 | -13.0884 | 1.01E-34 | 6.79E-33 | 68.02807 |
| AKAP12       | -1.20159 | 5.124141 | -13.0842 | 1.06E-34 | 7.07E-33 | 67.98473 |
| TJP3         | 0.732628 | 7.101624 | 13.08085 | 1.10E-34 | 7.30E-33 | 67.95099 |
| DAB2 /// LOC | -0.82394 | 7.888109 | -13.077  | 1.14E-34 | 7.55E-33 | 67.91188 |
| CSRP2        | -0.90059 | 8.335291 | -13.0633 | 1.31E-34 | 8.67E-33 | 67.77163 |
| MOXD1        | -1.05073 | 6.075539 | -13.0621 | 1.33E-34 | 8.75E-33 | 67.75965 |
| SMPD3        | 0.614867 | 5.433075 | 13.04565 | 1.57E-34 | 1.03E-32 | 67.59211 |
| EGR2         | -0.90361 | 7.141901 | -13.0389 | 1.69E-34 | 1.10E-32 | 67.52287 |
| TMEM54       | 0.751928 | 8.047411 | 13.02916 | 1.86E-34 | 1.21E-32 | 67.4242  |
| CPXM2        | -0.83172 | 5.649344 | -13.017  | 2.11E-34 | 1.36E-32 | 67.30032 |
| CDO1         | -0.61977 | 4.110574 | -13.0164 | 2.12E-34 | 1.37E-32 | 67.2946  |
| PTGFR        | -0.76757 | 3.945599 | -13.0066 | 2.35E-34 | 1.50E-32 | 67.19495 |
| GPX7         | -0.90482 | 6.268846 | -13.0025 | 2.45E-34 | 1.56E-32 | 67.15262 |
| NPHP3        | -0.6909  | 6.016032 | -13.0019 | 2.47E-34 | 1.57E-32 | 67.14729 |
| SH3RF3       | -0.72361 | 6.451655 | -12.9983 | 2.56E-34 | 1.62E-32 | 67.11019 |
| MCC          | -0.70796 | 6.206835 | -12.9938 | 2.68E-34 | 1.69E-32 | 67.0646  |
| ZNF542P      | -0.76438 | 4.84374  | -12.9905 | 2.77E-34 | 1.75E-32 | 67.03095 |
| SDC2         | -0.96634 | 7.415207 | -12.9816 | 3.04E-34 | 1.91E-32 | 66.94031 |
| TLR4         | -0.65562 | 5.51447  | -12.9777 | 3.16E-34 | 1.98E-32 | 66.90121 |
| HSPA6        | -0.74161 | 6.421736 | -12.9759 | 3.22E-34 | 2.01E-32 | 66.88286 |
| RSPO3        | -1.64505 | 7.31633  | -12.9467 | 4.35E-34 | 2.69E-32 | 66.5861  |
| LPPR4        | -1.00102 | 4.685732 | -12.9392 | 4.69E-34 | 2.89E-32 | 66.5104  |
| NRK          | -0.71077 | 3.555169 | -12.9256 | 5.39E-34 | 3.30E-32 | 66.37231 |
| AKR1B10      | 2.638697 | 9.416801 | 12.91413 | 6.06E-34 | 3.69E-32 | 66.2562  |
| GPX8         | -0.94904 | 7.055534 | -12.9138 | 6.09E-34 | 3.70E-32 | 66.25255 |
| HGD          | 0.991288 | 6.029677 | 12.90173 | 6.88E-34 | 4.17E-32 | 66.13061 |
| MGP          | -1.36785 | 7.191495 | -12.8901 | 7.76E-34 | 4.69E-32 | 66.01241 |
| ALPK2        | -0.77595 | 4.485083 | -12.8888 | 7.85E-34 | 4.74E-32 | 66.00005 |
| WIPF1        | -0.68679 | 6.09009  | -12.8878 | 7.94E-34 | 4.77E-32 | 65.98947 |
| ACTN1        | -0.68513 | 9.036912 | -12.8863 | 8.06E-34 | 4.84E-32 | 65.97405 |
| FKBP14       | -0.67734 | 6.358231 | -12.8798 | 8.61E-34 | 5.15E-32 | 65.90846 |
| IGFBP6       | -0.88396 | 7.435574 | -12.8639 | 1.01E-33 | 6.02E-32 | 65.74759 |
| FMO1         | -1.15122 | 5.627141 | -12.8616 | 1.04E-33 | 6.14E-32 | 65.72452 |
| FAM49A       | -0.64655 | 5.558984 | -12.843  | 1.25E-33 | 7.40E-32 | 65.5372  |
| GALNT6       | 1.073586 | 7.630642 | 12.83765 | 1.32E-33 | 7.78E-32 | 65.48283 |
| DCN          | -1.24678 | 9.37649  | -12.8258 | 1.49E-33 | 8.74E-32 | 65.36318 |
| SMIM24       | 1.560065 | 8.269807 | 12.82014 | 1.58E-33 | 9.23E-32 | 65.3062  |
| SFRP4        | -1.88231 | 6.747038 | -12.8125 | 1.71E-33 | 9.95E-32 | 65.22936 |
| WWTR1        | -0.89661 | 7.595549 | -12.8118 | 1.72E-33 | 1.00E-31 | 65.22174 |
| PDZRN4       | -1.51808 | 4.143947 | -12.8109 | 1.74E-33 | 1.01E-31 | 65.21313 |
| CYP4F12      | 0.619531 | 6.694632 | 12.8105  | 1.75E-33 | 1.01E-31 | 65.20893 |
| RASSF2       | -0.82198 | 7.384209 | -12.804  | 1.86E-33 | 1.07E-31 | 65.14364 |
| VCAM1        | -0.9707  | 8.546605 | -12.8016 | 1.91E-33 | 1.10E-31 | 65.11935 |
| SLC22A18     | 0.926465 | 8.340252 | 12.78137 | 2.35E-33 | 1.35E-31 | 64.91545 |
| GEM          | -0.99804 | 9.169277 | -12.7734 | 2.55E-33 | 1.46E-31 | 64.83482 |
| PDE4B        | -0.94012 | 6.166174 | -12.7707 | 2.62E-33 | 1.49E-31 | 64.80816 |
| EPS8L3       | 0.973041 | 7.719368 | 12.75547 | 3.05E-33 | 1.74E-31 | 64.65487 |
| DACT1        | -1.13713 | 7.159229 | -12.7394 | 3.60E-33 | 2.03E-31 | 64.49327 |

|              |          |          |          |          |          |          |
|--------------|----------|----------|----------|----------|----------|----------|
| 6-Sep        | -0.68349 | 5.853879 | -12.7295 | 3.98E-33 | 2.24E-31 | 64.3939  |
| CD163        | -1.06855 | 8.620306 | -12.7051 | 5.09E-33 | 2.85E-31 | 64.14855 |
| LINC00623 // | -0.80032 | 7.624606 | -12.7041 | 5.14E-33 | 2.87E-31 | 64.13879 |
| TNC          | -1.18411 | 4.674955 | -12.6817 | 6.45E-33 | 3.60E-31 | 63.91473 |
| STARD10      | 0.825447 | 8.522241 | 12.66615 | 7.55E-33 | 4.17E-31 | 63.75846 |
| TLR2         | -0.77285 | 7.373685 | -12.6635 | 7.76E-33 | 4.27E-31 | 63.73185 |
| MARVELD2     | 0.754358 | 7.163671 | 12.66052 | 8.00E-33 | 4.38E-31 | 63.70203 |
| FKBP7        | -0.74671 | 6.240598 | -12.6603 | 8.02E-33 | 4.38E-31 | 63.69968 |
| CCL8         | -1.33913 | 7.430515 | -12.6477 | 9.10E-33 | 4.94E-31 | 63.57389 |
| ADAMTS3      | -0.73656 | 4.282684 | -12.6451 | 9.35E-33 | 5.07E-31 | 63.54742 |
| TST          | 0.768433 | 10.21955 | 12.63757 | 1.01E-32 | 5.45E-31 | 63.4724  |
| EBF1         | -0.89039 | 5.732635 | -12.632  | 1.07E-32 | 5.76E-31 | 63.41631 |
| ROBO1        | -0.85352 | 8.480825 | -12.6301 | 1.09E-32 | 5.85E-31 | 63.39787 |
| FLRT2 /// LO | -0.89403 | 6.097703 | -12.6285 | 1.11E-32 | 5.94E-31 | 63.38153 |
| HMCN1        | -1.22759 | 5.654623 | -12.6139 | 1.28E-32 | 6.85E-31 | 63.23579 |
| CAP2         | -1.12666 | 6.361747 | -12.5993 | 1.48E-32 | 7.88E-31 | 63.0899  |
| NFIL3        | -0.62507 | 8.649922 | -12.5964 | 1.53E-32 | 8.06E-31 | 63.06085 |
| LAD1         | 0.643541 | 7.137174 | 12.58996 | 1.63E-32 | 8.56E-31 | 62.99669 |
| TMEM38A      | 0.707081 | 6.287291 | 12.58995 | 1.63E-32 | 8.56E-31 | 62.99659 |
| PRKCDPB      | -0.80009 | 7.701968 | -12.5784 | 1.83E-32 | 9.57E-31 | 62.88168 |
| HSPB8        | -0.84748 | 5.979833 | -12.5712 | 1.97E-32 | 1.03E-30 | 62.80927 |
| ESRP2 /// MI | 0.782685 | 8.101059 | 12.55744 | 2.26E-32 | 1.18E-30 | 62.67241 |
| LINC01133    | 0.843168 | 5.384727 | 12.55672 | 2.28E-32 | 1.18E-30 | 62.66523 |
| RASL12       | -0.65104 | 6.544852 | -12.5496 | 2.45E-32 | 1.27E-30 | 62.59423 |
| FAM129A      | -1.17594 | 8.24671  | -12.5492 | 2.46E-32 | 1.27E-30 | 62.59022 |
| MEF2C        | -0.89224 | 7.59393  | -12.5435 | 2.60E-32 | 1.34E-30 | 62.5338  |
| CELF2        | -0.79841 | 6.229343 | -12.542  | 2.64E-32 | 1.36E-30 | 62.5191  |
| GPNMB        | -1.07096 | 8.027127 | -12.5278 | 3.05E-32 | 1.55E-30 | 62.37707 |
| SOX17        | -0.62041 | 4.717691 | -12.5045 | 3.85E-32 | 1.96E-30 | 62.14555 |
| FOXA3        | 1.093791 | 7.894    | 12.49195 | 4.37E-32 | 2.21E-30 | 62.02086 |
| RRG          | -1.31181 | 5.875176 | -12.4803 | 4.91E-32 | 2.48E-30 | 61.90544 |
| ECM2         | -0.65846 | 6.282575 | -12.4748 | 5.19E-32 | 2.61E-30 | 61.85096 |
| FILIP1       | -1.1032  | 4.590511 | -12.4725 | 5.31E-32 | 2.67E-30 | 61.82731 |
| CALCRL       | -0.85456 | 6.109721 | -12.4657 | 5.68E-32 | 2.84E-30 | 61.76037 |
| FAM3B        | 2.143184 | 8.245218 | 12.46482 | 5.74E-32 | 2.86E-30 | 61.75152 |
| COMTD1       | 0.619697 | 7.825784 | 12.46134 | 5.94E-32 | 2.95E-30 | 61.71697 |
| SSTR1        | 0.835785 | 5.080361 | 12.4595  | 6.05E-32 | 3.00E-30 | 61.69876 |
| NR3C1        | -0.81277 | 8.53548  | -12.459  | 6.08E-32 | 3.01E-30 | 61.69392 |
| CREBRF       | -0.60883 | 6.715587 | -12.4515 | 6.55E-32 | 3.23E-30 | 61.61956 |
| SMIM3        | -0.72048 | 7.713939 | -12.4412 | 7.27E-32 | 3.57E-30 | 61.51708 |
| PLEKHA6      | 0.612409 | 6.518807 | 12.43866 | 7.45E-32 | 3.65E-30 | 61.49211 |
| RP11-363E7.  | 1.30315  | 6.684376 | 12.42032 | 8.95E-32 | 4.36E-30 | 61.31054 |
| B3GNT3       | 0.627189 | 7.844874 | 12.4087  | 1.01E-31 | 4.88E-30 | 61.19555 |
| HS3ST3A1     | -0.81311 | 4.803834 | -12.4081 | 1.01E-31 | 4.90E-30 | 61.18977 |
| ALDH3A1      | 1.338576 | 6.514004 | 12.39821 | 1.12E-31 | 5.39E-30 | 61.09171 |
| PXDN         | -0.76736 | 8.189368 | -12.398  | 1.12E-31 | 5.40E-30 | 61.08923 |
| LNX1         | 0.636034 | 6.040601 | 12.39745 | 1.13E-31 | 5.41E-30 | 61.08424 |
| CAPN5        | 0.709777 | 7.202784 | 12.38943 | 1.22E-31 | 5.85E-30 | 61.00497 |
| CCDC50       | -0.64796 | 6.683321 | -12.3805 | 1.33E-31 | 6.37E-30 | 60.91628 |
| ITGA7        | -0.79218 | 5.69894  | -12.3783 | 1.36E-31 | 6.50E-30 | 60.89519 |
| MICU3        | -0.97256 | 3.960467 | -12.3721 | 1.45E-31 | 6.90E-30 | 60.83322 |
| LARP6        | -0.893   | 6.086495 | -12.3679 | 1.51E-31 | 7.18E-30 | 60.79195 |
| LOC1005071   | -0.77737 | 4.280707 | -12.3642 | 1.57E-31 | 7.44E-30 | 60.75543 |
| KCNE4        | -0.63373 | 5.123776 | -12.3593 | 1.65E-31 | 7.74E-30 | 60.70772 |
| GNG11        | -0.68015 | 6.227231 | -12.3468 | 1.87E-31 | 8.76E-30 | 60.58395 |
| IFI16        | -0.79499 | 9.432231 | -12.3422 | 1.95E-31 | 9.15E-30 | 60.53812 |
| PLSCR4       | -1.01376 | 7.439553 | -12.3388 | 2.02E-31 | 9.45E-30 | 60.50507 |
| IL6          | -1.43563 | 7.054071 | -12.3382 | 2.03E-31 | 9.48E-30 | 60.49911 |

|              |          |          |          |          |          |          |
|--------------|----------|----------|----------|----------|----------|----------|
| PRSS23       | -0.84537 | 7.481578 | -12.3347 | 2.11E-31 | 9.81E-30 | 60.46418 |
| PRR15        | 1.031585 | 7.868695 | 12.32214 | 2.38E-31 | 1.11E-29 | 60.34084 |
| PDLIM3       | -0.88816 | 5.282785 | -12.32   | 2.44E-31 | 1.13E-29 | 60.31976 |
| ARMCX1       | -1.08247 | 7.330234 | -12.3169 | 2.51E-31 | 1.16E-29 | 60.2892  |
| CCDC69       | -1.0577  | 6.418514 | -12.3168 | 2.51E-31 | 1.16E-29 | 60.28864 |
| GJA1         | -0.89176 | 10.27538 | -12.3122 | 2.63E-31 | 1.21E-29 | 60.24338 |
| SPARCL1      | -1.08566 | 11.08084 | -12.2986 | 3.01E-31 | 1.38E-29 | 60.10937 |
| GJC1         | -0.59342 | 4.757698 | -12.2977 | 3.04E-31 | 1.39E-29 | 60.09998 |
| MAP3K7CL     | -0.58958 | 5.166089 | -12.2965 | 3.08E-31 | 1.41E-29 | 60.08849 |
| TMEM47       | -1.04474 | 8.287483 | -12.2878 | 3.36E-31 | 1.53E-29 | 60.00284 |
| MMEL1        | 0.625924 | 6.373536 | 12.25793 | 4.51E-31 | 2.04E-29 | 59.70923 |
| OLFML3       | -1.03989 | 7.774264 | -12.2357 | 5.63E-31 | 2.53E-29 | 59.49097 |
| SGK2         | 0.774502 | 6.081691 | 12.22127 | 6.49E-31 | 2.90E-29 | 59.34945 |
| MUC5AC       | 2.153209 | 8.002166 | 12.2123  | 7.10E-31 | 3.16E-29 | 59.26152 |
| ELMO3        | 0.675892 | 6.749581 | 12.20845 | 7.37E-31 | 3.28E-29 | 59.22386 |
| LOC1005060   | 0.82646  | 6.633109 | 12.19218 | 8.66E-31 | 3.84E-29 | 59.06452 |
| SH3BGRL2     | 0.759316 | 8.848027 | 12.19143 | 8.72E-31 | 3.85E-29 | 59.05713 |
| PDGFC        | -0.86194 | 7.330748 | -12.1914 | 8.73E-31 | 3.85E-29 | 59.057   |
| SSPN         | -0.99763 | 6.697403 | -12.1823 | 9.55E-31 | 4.19E-29 | 58.9679  |
| PTX3         | -1.27108 | 4.433585 | -12.1607 | 1.18E-30 | 5.17E-29 | 58.75694 |
| IGSF9        | 0.737402 | 5.390568 | 12.1591  | 1.20E-30 | 5.24E-29 | 58.74093 |
| C11orf52 /// | 0.786435 | 6.402591 | 12.14578 | 1.37E-30 | 5.95E-29 | 58.61074 |
| BRI3BP ///   | 0.692743 | 8.578475 | 12.14056 | 1.44E-30 | 6.26E-29 | 58.55975 |
| KGFLP2       | -0.82117 | 4.811649 | -12.131  | 1.58E-30 | 6.86E-29 | 58.46694 |
| LY96         | -0.96843 | 8.073725 | -12.1204 | 1.76E-30 | 7.58E-29 | 58.36259 |
| RGL1         | -0.64566 | 7.924757 | -12.1123 | 1.91E-30 | 8.17E-29 | 58.28365 |
| ENTPD5       | 0.588217 | 5.491228 | 12.09752 | 2.20E-30 | 9.36E-29 | 58.13998 |
| EPB41L3      | -0.97937 | 6.130136 | -12.0934 | 2.29E-30 | 9.72E-29 | 58.10004 |
| LRP12        | -0.69105 | 4.554439 | -12.0794 | 2.63E-30 | 1.11E-28 | 57.96396 |
| USH1C        | 0.935277 | 7.478836 | 12.07857 | 2.66E-30 | 1.12E-28 | 57.95542 |
| MGC24103     | -0.93357 | 4.16393  | -12.074  | 2.78E-30 | 1.17E-28 | 57.9107  |
| SRGN         | -0.97223 | 10.35971 | -12.071  | 2.86E-30 | 1.20E-28 | 57.88142 |
| OR7E14P      | 0.92968  | 5.980322 | 12.06623 | 3.00E-30 | 1.25E-28 | 57.83534 |
| FBXO32       | -0.66714 | 5.029615 | -12.0545 | 3.36E-30 | 1.40E-28 | 57.72142 |
| BCL2L15      | 0.972893 | 6.490582 | 12.04797 | 3.59E-30 | 1.49E-28 | 57.65784 |
| PTGS2        | -1.49231 | 7.067488 | -12.0434 | 3.75E-30 | 1.56E-28 | 57.61332 |
| BOC          | -0.89818 | 6.53251  | -12.0371 | 3.99E-30 | 1.65E-28 | 57.55211 |
| DPCR1        | 2.20072  | 7.153066 | 12.036   | 4.03E-30 | 1.67E-28 | 57.54157 |
| GABARAPL1    | -0.77358 | 8.783527 | -12.0354 | 4.06E-30 | 1.67E-28 | 57.5358  |
| MAPK13       | 0.791816 | 8.450125 | 12.0333  | 4.14E-30 | 1.71E-28 | 57.51526 |
| FCGR1B       | -1.03425 | 6.794488 | -12.0206 | 4.69E-30 | 1.92E-28 | 57.39229 |
| SGIP1        | -0.60884 | 4.304175 | -12.0152 | 4.95E-30 | 2.02E-28 | 57.33969 |
| ITPR1        | -0.70865 | 6.092439 | -12.0045 | 5.49E-30 | 2.24E-28 | 57.23614 |
| SERPINE1     | -1.00898 | 7.17098  | -12.002  | 5.63E-30 | 2.28E-28 | 57.21171 |
| BEX4         | -1.16168 | 6.951372 | -11.9981 | 5.85E-30 | 2.37E-28 | 57.17368 |
| MYO5C        | 0.693646 | 9.235846 | 11.99689 | 5.92E-30 | 2.39E-28 | 57.16204 |
| TYROBP       | -0.87126 | 8.724226 | -11.9836 | 6.74E-30 | 2.72E-28 | 57.03314 |
| AIF1         | -0.69198 | 8.728056 | -11.9645 | 8.13E-30 | 3.25E-28 | 56.84793 |
| CSGALNACT    | -0.94946 | 7.906237 | -11.9596 | 8.53E-30 | 3.40E-28 | 56.80108 |
| MAGEH1       | -0.76494 | 7.760175 | -11.9562 | 8.82E-30 | 3.51E-28 | 56.76818 |
| CNN1         | -1.70149 | 8.154073 | -11.9509 | 9.29E-30 | 3.70E-28 | 56.71649 |
| MBNL1-AS1    | -1.1475  | 5.914231 | -11.944  | 9.93E-30 | 3.95E-28 | 56.65033 |
| CCR1         | -0.73687 | 7.043133 | -11.9415 | 1.02E-29 | 4.04E-28 | 56.6255  |
| LAMA2        | -0.83954 | 6.335343 | -11.9384 | 1.05E-29 | 4.15E-28 | 56.59584 |
| PCDH17       | -0.73518 | 6.992546 | -11.9373 | 1.06E-29 | 4.19E-28 | 56.58547 |
| SACS         | -0.90799 | 7.000099 | -11.9339 | 1.10E-29 | 4.33E-28 | 56.55228 |
| SMIM6        | 0.998225 | 6.928024 | 11.92993 | 1.14E-29 | 4.48E-28 | 56.51411 |
| HDHD3        | 0.604471 | 7.385706 | 11.90012 | 1.52E-29 | 5.97E-28 | 56.22642 |

|              |          |          |          |          |          |          |
|--------------|----------|----------|----------|----------|----------|----------|
| EOGT         | -0.68652 | 7.344501 | -11.8995 | 1.53E-29 | 6.00E-28 | 56.22054 |
| RAB11FIP4    | 0.610194 | 6.125229 | 11.89623 | 1.58E-29 | 6.18E-28 | 56.18892 |
| CORO2A       | 0.861851 | 7.383605 | 11.89333 | 1.63E-29 | 6.35E-28 | 56.161   |
| NUDT11       | -0.65266 | 4.977424 | -11.8815 | 1.83E-29 | 7.10E-28 | 56.04661 |
| FILIP1L      | -0.90852 | 8.407908 | -11.8744 | 1.96E-29 | 7.58E-28 | 55.97811 |
| NREP         | -0.59452 | 5.789592 | -11.8735 | 1.98E-29 | 7.63E-28 | 55.9697  |
| SLC44A4      | 1.159861 | 7.40247  | 11.87189 | 2.01E-29 | 7.74E-28 | 55.95436 |
| CDH5         | -0.72749 | 6.749211 | -11.866  | 2.12E-29 | 8.16E-28 | 55.89803 |
| LOC1001308   | -0.76117 | 8.330709 | -11.8659 | 2.13E-29 | 8.16E-28 | 55.89649 |
| SGCD         | -0.6086  | 5.337897 | -11.8622 | 2.21E-29 | 8.45E-28 | 55.86062 |
| LRRC66       | 1.224647 | 5.464813 | 11.86176 | 2.21E-29 | 8.47E-28 | 55.85684 |
| RP11-999E24  | -0.74899 | 3.865749 | -11.8496 | 2.49E-29 | 9.50E-28 | 55.74012 |
| VSIG4        | -0.89962 | 7.233125 | -11.8417 | 2.69E-29 | 1.02E-27 | 55.66406 |
| PDPN         | -0.65504 | 6.236898 | -11.8253 | 3.16E-29 | 1.20E-27 | 55.50626 |
| PLS1         | 1.088983 | 10.33536 | 11.8184  | 3.37E-29 | 1.28E-27 | 55.43997 |
| FUT2         | 0.707768 | 7.341455 | 11.81788 | 3.39E-29 | 1.28E-27 | 55.43498 |
| CHRD12       | -1.2796  | 6.066389 | -11.8171 | 3.42E-29 | 1.29E-27 | 55.42748 |
| FNBP1        | -0.65431 | 6.816935 | -11.816  | 3.45E-29 | 1.30E-27 | 55.41683 |
| RAB25        | 1.008342 | 9.58904  | 11.81253 | 3.57E-29 | 1.34E-27 | 55.3836  |
| BAIAP2L1     | 0.672593 | 7.919438 | 11.80302 | 3.92E-29 | 1.46E-27 | 55.29237 |
| IGFBP4       | -0.83203 | 8.19763  | -11.7962 | 4.18E-29 | 1.55E-27 | 55.22742 |
| ASL          | 0.681727 | 8.915983 | 11.78277 | 4.77E-29 | 1.76E-27 | 55.09819 |
| SVIL         | -0.93808 | 7.320773 | -11.782  | 4.80E-29 | 1.77E-27 | 55.09067 |
| LINC01094    | -0.80189 | 4.425079 | -11.7766 | 5.06E-29 | 1.85E-27 | 55.03907 |
| ABHD14A-A    | 0.728235 | 8.123589 | 11.76973 | 5.41E-29 | 1.97E-27 | 54.97328 |
| LBH          | -0.69075 | 8.314015 | -11.7662 | 5.60E-29 | 2.03E-27 | 54.93941 |
| THBS1        | -0.89499 | 6.108697 | -11.7616 | 5.85E-29 | 2.12E-27 | 54.89576 |
| CSF1R        | -0.61768 | 7.172645 | -11.7596 | 5.97E-29 | 2.16E-27 | 54.8762  |
| EFEMP1       | -1.45811 | 6.956921 | -11.7587 | 6.02E-29 | 2.17E-27 | 54.86771 |
| PRNP         | -0.70872 | 8.691012 | -11.7574 | 6.10E-29 | 2.20E-27 | 54.85508 |
| DHRS11       | 0.990513 | 6.438294 | 11.75271 | 6.38E-29 | 2.29E-27 | 54.81035 |
| TMEM45B      | 1.173354 | 9.243892 | 11.75091 | 6.49E-29 | 2.33E-27 | 54.79311 |
| LILRB2       | -0.62296 | 5.733425 | -11.712  | 9.45E-29 | 3.36E-27 | 54.42162 |
| LTBP1        | -0.85401 | 8.189158 | -11.7085 | 9.77E-29 | 3.47E-27 | 54.3882  |
| UGT1A1 /// ( | 1.318836 | 8.117979 | 11.70381 | 1.02E-28 | 3.63E-27 | 54.34299 |
| CYP3A5       | 1.322412 | 7.902363 | 11.69404 | 1.12E-28 | 3.98E-27 | 54.24978 |
| HAND2-AS1    | -1.1636  | 4.131393 | -11.6868 | 1.20E-28 | 4.26E-27 | 54.181   |
| C14orf132    | -0.84799 | 5.977249 | -11.6858 | 1.22E-28 | 4.30E-27 | 54.17159 |
| DEGS2        | 0.679836 | 6.090781 | 11.68466 | 1.23E-28 | 4.34E-27 | 54.16035 |
| MAP3K8       | -0.62101 | 5.957985 | -11.68   | 1.29E-28 | 4.53E-27 | 54.11597 |
| PYGL         | -0.82334 | 6.768719 | -11.6754 | 1.35E-28 | 4.72E-27 | 54.07175 |
| FA2H         | 0.718804 | 6.510082 | 11.67363 | 1.37E-28 | 4.80E-27 | 54.0552  |
| GALNT15      | -0.73609 | 4.364808 | -11.6659 | 1.47E-28 | 5.15E-27 | 53.98123 |
| ARRDC3       | -0.63324 | 8.433246 | -11.6495 | 1.73E-28 | 5.99E-27 | 53.8251  |
| BAG2         | -0.75257 | 5.134278 | -11.6461 | 1.78E-28 | 6.17E-27 | 53.79341 |
| SULT1C2      | 1.74674  | 7.901943 | 11.63519 | 1.98E-28 | 6.82E-27 | 53.68931 |
| COL10A1      | -1.731   | 7.105493 | -11.6348 | 1.99E-28 | 6.83E-27 | 53.68574 |
| PRELP        | -0.84824 | 6.29803  | -11.6265 | 2.15E-28 | 7.38E-27 | 53.60673 |
| UGT1A1 /// ( | 1.454686 | 7.313006 | 11.62337 | 2.22E-28 | 7.60E-27 | 53.57696 |
| RDX          | -0.78779 | 5.301941 | -11.599  | 2.80E-28 | 9.57E-27 | 53.34595 |
| PLLP         | 1.031624 | 8.427465 | 11.59326 | 2.96E-28 | 1.01E-26 | 53.2911  |
| MIR143HG     | -0.8718  | 5.473859 | -11.5849 | 3.21E-28 | 1.09E-26 | 53.21185 |
| PRICKLE1     | -0.7504  | 5.174272 | -11.574  | 3.56E-28 | 1.20E-26 | 53.10868 |
| PRUNE2       | -1.10162 | 4.618529 | -11.5623 | 3.99E-28 | 1.34E-26 | 52.99752 |
| BSPRY        | 0.661062 | 6.85141  | 11.55534 | 4.26E-28 | 1.42E-26 | 52.93183 |
| GIMAP4       | -0.78074 | 7.670156 | -11.5426 | 4.81E-28 | 1.60E-26 | 52.81093 |
| MLLT11       | -1.00106 | 7.369939 | -11.5138 | 6.34E-28 | 2.10E-26 | 52.53871 |
| GPR65        | -0.7821  | 7.011467 | -11.5131 | 6.38E-28 | 2.10E-26 | 52.53237 |

|              |          |          |          |          |          |          |
|--------------|----------|----------|----------|----------|----------|----------|
| GPR116       | -0.62349 | 7.323051 | -11.5129 | 6.39E-28 | 2.11E-26 | 52.53015 |
| ADTRP        | 1.214648 | 6.58472  | 11.51008 | 6.57E-28 | 2.16E-26 | 52.50391 |
| SPON1        | -1.20297 | 6.394844 | -11.5001 | 7.22E-28 | 2.37E-26 | 52.40946 |
| ATP8B4       | -0.66489 | 4.082336 | -11.4967 | 7.46E-28 | 2.44E-26 | 52.37758 |
| THBD         | -0.72174 | 7.110594 | -11.4774 | 8.96E-28 | 2.92E-26 | 52.19604 |
| SPHK1        | -0.65926 | 6.329838 | -11.4596 | 1.06E-27 | 3.45E-26 | 52.02767 |
| MYO1A        | 1.011589 | 6.78695  | 11.45639 | 1.10E-27 | 3.55E-26 | 51.99767 |
| TFF2         | 2.336307 | 10.05656 | 11.45465 | 1.11E-27 | 3.60E-26 | 51.98132 |
| PTPRH        | 0.871796 | 6.866706 | 11.45301 | 1.13E-27 | 3.64E-26 | 51.96587 |
| GPRASP1      | -1.11177 | 5.518996 | -11.4458 | 1.21E-27 | 3.89E-26 | 51.89764 |
| MSANTD3-T    | -0.70243 | 4.739875 | -11.4448 | 1.22E-27 | 3.92E-26 | 51.88852 |
| PLOD2        | -0.78223 | 8.643541 | -11.443  | 1.24E-27 | 3.98E-26 | 51.87191 |
| DPYSL2       | -0.60965 | 10.3098  | -11.4422 | 1.25E-27 | 4.01E-26 | 51.86427 |
| RBM24        | -1.00878 | 4.379469 | -11.4382 | 1.30E-27 | 4.16E-26 | 51.8265  |
| FMO2         | -0.97434 | 5.954241 | -11.4345 | 1.35E-27 | 4.29E-26 | 51.79208 |
| TSTA3        | 0.654553 | 9.641749 | 11.42924 | 1.42E-27 | 4.50E-26 | 51.74229 |
| MMRN2        | -0.77468 | 5.975617 | -11.3988 | 1.89E-27 | 6.00E-26 | 51.45612 |
| LRRFIP1      | -0.6133  | 7.71429  | -11.3916 | 2.03E-27 | 6.41E-26 | 51.38923 |
| ARHGEF6      | -0.68075 | 7.600149 | -11.3832 | 2.20E-27 | 6.93E-26 | 51.31018 |
| STOM         | -0.62985 | 9.540433 | -11.3709 | 2.47E-27 | 7.78E-26 | 51.19456 |
| C1orf116     | 1.047813 | 7.975607 | 11.36916 | 2.51E-27 | 7.90E-26 | 51.17856 |
| THEMIS2      | -0.68949 | 6.85808  | -11.3608 | 2.72E-27 | 8.53E-26 | 51.09984 |
| HTRA1        | -0.74201 | 9.28164  | -11.3595 | 2.75E-27 | 8.62E-26 | 51.08778 |
| BCHE         | -1.39277 | 4.316196 | -11.3583 | 2.78E-27 | 8.69E-26 | 51.0772  |
| LLGL2        | 0.59326  | 7.2744   | 11.35269 | 2.93E-27 | 9.15E-26 | 51.02441 |
| CD69         | -1.08444 | 6.865037 | -11.3249 | 3.81E-27 | 1.18E-25 | 50.76488 |
| POPDC2       | -0.90722 | 4.610562 | -11.3217 | 3.93E-27 | 1.22E-25 | 50.73445 |
| RDH12        | 0.766187 | 5.025279 | 11.3208  | 3.96E-27 | 1.23E-25 | 50.7262  |
| TMEM55A      | -0.81885 | 6.284029 | -11.3205 | 3.97E-27 | 1.23E-25 | 50.72379 |
| HSPA2        | -1.01687 | 7.160076 | -11.3099 | 4.39E-27 | 1.36E-25 | 50.62419 |
| FCGR1A /// F | -0.92533 | 6.812236 | -11.3072 | 4.50E-27 | 1.39E-25 | 50.59944 |
| CYSTM1       | 0.764159 | 12.01353 | 11.29915 | 4.86E-27 | 1.49E-25 | 50.52412 |
| DCLK1        | -0.94415 | 4.518582 | -11.2945 | 5.08E-27 | 1.56E-25 | 50.48102 |
| PARVA        | -0.68237 | 6.889209 | -11.2894 | 5.33E-27 | 1.63E-25 | 50.43323 |
| TMEM71       | -0.80895 | 5.709522 | -11.2803 | 5.81E-27 | 1.78E-25 | 50.34826 |
| MNDA         | -1.00671 | 7.471507 | -11.28   | 5.82E-27 | 1.78E-25 | 50.34547 |
| ADAM12       | -0.87292 | 5.213381 | -11.2741 | 6.16E-27 | 1.88E-25 | 50.29014 |
| PPFIBP2      | 0.594264 | 8.053417 | 11.27057 | 6.36E-27 | 1.94E-25 | 50.25768 |
| TENM4        | -0.59001 | 4.925634 | -11.2579 | 7.17E-27 | 2.17E-25 | 50.13988 |
| SRPX         | -1.29869 | 7.021989 | -11.2541 | 7.43E-27 | 2.25E-25 | 50.10396 |
| CHRD1        | -1.60093 | 5.947595 | -11.2534 | 7.48E-27 | 2.26E-25 | 50.09787 |
| TMEM246      | 0.632724 | 6.988501 | 11.24753 | 7.91E-27 | 2.39E-25 | 50.04318 |
| PDZRN3       | -0.58742 | 5.692736 | -11.2426 | 8.28E-27 | 2.50E-25 | 49.99716 |
| ACTA2 /// A  | -0.9835  | 4.752046 | -11.2415 | 8.36E-27 | 2.52E-25 | 49.98761 |
| DNAJB5       | -0.64004 | 5.246363 | -11.2409 | 8.42E-27 | 2.53E-25 | 49.98124 |
| BCAT1        | -0.77995 | 6.301623 | -11.2344 | 8.94E-27 | 2.68E-25 | 49.92132 |
| KDELC1       | -0.64071 | 6.401625 | -11.2285 | 9.45E-27 | 2.83E-25 | 49.86649 |
| LIMS2        | -0.69567 | 6.412239 | -11.2247 | 9.79E-27 | 2.93E-25 | 49.83134 |
| CAPN9        | 1.289829 | 5.660369 | 11.22379 | 9.88E-27 | 2.95E-25 | 49.82254 |
| FAM83F       | 0.616529 | 6.144893 | 11.22241 | 1.00E-26 | 2.98E-25 | 49.80978 |
| FGL2         | -1.02212 | 8.771138 | -11.2207 | 1.02E-26 | 3.02E-25 | 49.79345 |
| LMOD1        | -1.11336 | 6.267283 | -11.2111 | 1.11E-26 | 3.30E-25 | 49.70475 |
| MEIS1        | -0.91328 | 6.742705 | -11.205  | 1.18E-26 | 3.48E-25 | 49.64803 |
| TMC4         | 0.765108 | 8.307015 | 11.20344 | 1.20E-26 | 3.53E-25 | 49.63365 |
| MYO5B        | 0.940227 | 7.823239 | 11.18775 | 1.39E-26 | 4.07E-25 | 49.4882  |
| SCRG1        | -1.07752 | 4.380482 | -11.1838 | 1.44E-26 | 4.22E-25 | 49.45143 |
| CMTM8        | 0.633971 | 7.805836 | 11.18261 | 1.45E-26 | 4.26E-25 | 49.44057 |
| AKR1C2 /// L | 1.223953 | 9.179247 | 11.18056 | 1.48E-26 | 4.34E-25 | 49.4215  |

|           |          |          |          |          |          |          |
|-----------|----------|----------|----------|----------|----------|----------|
| A2M-AS1   | -0.62784 | 4.417149 | -11.1792 | 1.50E-26 | 4.39E-25 | 49.40927 |
| THSD7A    | -0.76969 | 4.919801 | -11.1757 | 1.55E-26 | 4.52E-25 | 49.37632 |
| CLEC4A    | -0.80355 | 6.09694  | -11.1722 | 1.60E-26 | 4.66E-25 | 49.34387 |
| GIMAP6    | -0.83031 | 7.214848 | -11.1644 | 1.73E-26 | 5.00E-25 | 49.27163 |
| EID1      | -0.58795 | 8.768725 | -11.148  | 2.01E-26 | 5.78E-25 | 49.12026 |
| FAM101B   | -0.61047 | 8.067374 | -11.1475 | 2.02E-26 | 5.80E-25 | 49.11594 |
| INMT      | -0.85028 | 6.052105 | -11.144  | 2.09E-26 | 5.98E-25 | 49.08274 |
| PAQR8     | 0.780629 | 8.507091 | 11.14252 | 2.12E-26 | 6.04E-25 | 49.06948 |
| PRSS3     | 1.089786 | 9.075132 | 11.13575 | 2.25E-26 | 6.43E-25 | 49.00698 |
| FPR3      | -0.77991 | 6.745791 | -11.1096 | 2.88E-26 | 8.12E-25 | 48.76579 |
| LRRN4CL   | -0.88107 | 5.740692 | -11.1041 | 3.03E-26 | 8.53E-25 | 48.71442 |
| GHR       | -1.13635 | 4.630823 | -11.1037 | 3.04E-26 | 8.54E-25 | 48.71146 |
| RBMS3     | -0.64755 | 4.741331 | -11.0907 | 3.43E-26 | 9.64E-25 | 48.59091 |
| CXADR     | 0.858853 | 8.088064 | 11.08917 | 3.48E-26 | 9.76E-25 | 48.57713 |
| CSF2RB    | -0.90573 | 7.782644 | -11.0811 | 3.75E-26 | 1.05E-24 | 48.50299 |
| TNFSF4    | -0.81321 | 5.573109 | -11.076  | 3.94E-26 | 1.10E-24 | 48.45611 |
| LTBP2     | -0.72686 | 7.630964 | -11.0759 | 3.94E-26 | 1.10E-24 | 48.45513 |
| MS4A7     | -0.88648 | 8.053086 | -11.0735 | 4.03E-26 | 1.12E-24 | 48.43269 |
| FAM127A   | -0.58805 | 8.991062 | -11.073  | 4.05E-26 | 1.12E-24 | 48.42819 |
| ATP7B     | 0.892343 | 6.87993  | 11.06804 | 4.24E-26 | 1.17E-24 | 48.38253 |
| AGR2      | 1.356702 | 11.39744 | 11.06216 | 4.48E-26 | 1.23E-24 | 48.32846 |
| BCAS1     | 1.203823 | 7.196718 | 11.05609 | 4.74E-26 | 1.30E-24 | 48.27263 |
| FKBP5     | -0.72775 | 7.41582  | -11.0525 | 4.90E-26 | 1.34E-24 | 48.2396  |
| SYNM      | -1.67857 | 8.00078  | -11.0514 | 4.95E-26 | 1.36E-24 | 48.2294  |
| ANGPTL1   | -1.10699 | 4.417161 | -11.0477 | 5.13E-26 | 1.40E-24 | 48.19503 |
| FCER1G    | -0.91001 | 7.984334 | -11.0313 | 5.97E-26 | 1.62E-24 | 48.04519 |
| FAM229B   | -0.75967 | 6.469141 | -11.0282 | 6.14E-26 | 1.67E-24 | 48.01649 |
| WWC3      | -0.62434 | 7.671285 | -11.0256 | 6.29E-26 | 1.71E-24 | 47.99269 |
| PLN       | -1.58261 | 5.750141 | -11.0212 | 6.56E-26 | 1.78E-24 | 47.95183 |
| TMEM119   | -0.78481 | 5.602073 | -11.0121 | 7.13E-26 | 1.93E-24 | 47.86835 |
| PRR15L    | 1.053608 | 9.174606 | 10.99553 | 8.32E-26 | 2.24E-24 | 47.71669 |
| FLNC      | -0.88908 | 7.349824 | -10.992  | 8.59E-26 | 2.31E-24 | 47.68462 |
| COL16A1   | -0.8414  | 7.70307  | -10.9891 | 8.83E-26 | 2.37E-24 | 47.65772 |
| GDPD3     | 0.858826 | 6.766254 | 10.98193 | 9.43E-26 | 2.52E-24 | 47.59216 |
| CLEC7A    | -0.60769 | 4.434322 | -10.9794 | 9.66E-26 | 2.57E-24 | 47.56888 |
| GBP2      | -0.69435 | 8.455468 | -10.9682 | 1.07E-25 | 2.85E-24 | 47.46665 |
| ELF3      | 0.937734 | 9.005854 | 10.9617  | 1.14E-25 | 3.01E-24 | 47.40708 |
| RBPMS2    | -1.03627 | 6.369923 | -10.96   | 1.16E-25 | 3.06E-24 | 47.39169 |
| ADAMTS1   | -0.92315 | 7.304915 | -10.9403 | 1.39E-25 | 3.65E-24 | 47.21108 |
| CYP2C18   | 1.413065 | 6.873005 | 10.93369 | 1.47E-25 | 3.86E-24 | 47.15116 |
| S100A14   | 1.187654 | 8.545663 | 10.91811 | 1.70E-25 | 4.44E-24 | 47.00908 |
| C9orf152  | 1.326101 | 7.448827 | 10.91789 | 1.71E-25 | 4.45E-24 | 47.00706 |
| MS4A4A    | -0.93401 | 7.071963 | -10.9053 | 1.92E-25 | 4.96E-24 | 46.89236 |
| ARL4C     | -0.5969  | 7.477728 | -10.9021 | 1.97E-25 | 5.10E-24 | 46.86352 |
| FAM13B    | -0.64083 | 7.625078 | -10.8907 | 2.19E-25 | 5.65E-24 | 46.75902 |
| GLRB      | -0.72721 | 3.785976 | -10.8839 | 2.33E-25 | 5.98E-24 | 46.6976  |
| LOC728392 | -0.77894 | 6.370245 | -10.8797 | 2.43E-25 | 6.20E-24 | 46.65876 |
| BARX1     | -0.8382  | 5.398578 | -10.8788 | 2.45E-25 | 6.25E-24 | 46.65065 |
| DHCR24    | 0.751656 | 9.075415 | 10.87742 | 2.48E-25 | 6.32E-24 | 46.6385  |
| RGS4      | -0.71266 | 5.454857 | -10.8643 | 2.79E-25 | 7.10E-24 | 46.51902 |
| ST14      | 0.770153 | 8.056753 | 10.85666 | 3.00E-25 | 7.60E-24 | 46.44972 |
| EVI2A     | -0.868   | 7.697116 | -10.8449 | 3.34E-25 | 8.42E-24 | 46.34316 |
| FHOD3     | -0.73457 | 4.552559 | -10.8344 | 3.68E-25 | 9.25E-24 | 46.24745 |
| SLC35A3   | 0.601058 | 8.836633 | 10.83435 | 3.68E-25 | 9.25E-24 | 46.24718 |
| CLIC2     | -0.83234 | 6.546688 | -10.8279 | 3.90E-25 | 9.79E-24 | 46.18917 |
| FBP1      | 0.819935 | 8.519222 | 10.80943 | 4.62E-25 | 1.15E-23 | 46.02131 |
| KDSR      | -0.60539 | 6.666758 | -10.7982 | 5.13E-25 | 1.27E-23 | 45.91928 |
| RIMKLB    | -0.7579  | 4.756798 | -10.7909 | 5.48E-25 | 1.36E-23 | 45.85376 |

|               |          |          |          |          |          |          |
|---------------|----------|----------|----------|----------|----------|----------|
| NR0B2         | 0.803163 | 6.786967 | 10.79026 | 5.51E-25 | 1.36E-23 | 45.84777 |
| KCNK5         | 0.749308 | 6.89675  | 10.78558 | 5.75E-25 | 1.42E-23 | 45.80552 |
| LDOC1         | -0.68287 | 6.408803 | -10.7812 | 5.99E-25 | 1.47E-23 | 45.76592 |
| CFH /// CFHF  | -0.91539 | 8.783629 | -10.7744 | 6.37E-25 | 1.57E-23 | 45.70474 |
| RNF128        | 1.248333 | 9.638589 | 10.77029 | 6.62E-25 | 1.62E-23 | 45.66728 |
| KCNMB1        | -0.61217 | 4.844549 | -10.7641 | 7.00E-25 | 1.71E-23 | 45.61151 |
| LAPTM5        | -0.6784  | 9.708212 | -10.7587 | 7.35E-25 | 1.79E-23 | 45.56285 |
| BRI3BP        | 0.623458 | 9.614997 | 10.75635 | 7.51E-25 | 1.83E-23 | 45.54141 |
| LINC00675     | 0.614719 | 5.943761 | 10.74482 | 8.35E-25 | 2.03E-23 | 45.43735 |
| SLIT3         | -0.65534 | 5.301717 | -10.7419 | 8.58E-25 | 2.08E-23 | 45.41095 |
| C1QTNF2       | -0.76117 | 4.990411 | -10.7385 | 8.84E-25 | 2.14E-23 | 45.38053 |
| ADAMTS5       | -0.68983 | 6.276216 | -10.7276 | 9.77E-25 | 2.35E-23 | 45.28169 |
| NAP1L2        | -0.8656  | 3.860065 | -10.7238 | 1.01E-24 | 2.43E-23 | 45.2477  |
| KRT19         | 0.690112 | 7.84223  | 10.72042 | 1.04E-24 | 2.51E-23 | 45.21736 |
| NCF2          | -0.85077 | 6.819375 | -10.7137 | 1.11E-24 | 2.66E-23 | 45.15689 |
| C3orf80       | -0.68969 | 4.335263 | -10.6977 | 1.28E-24 | 3.07E-23 | 45.01297 |
| FAM101A ///   | 0.958283 | 7.919286 | 10.67892 | 1.52E-24 | 3.63E-23 | 44.84414 |
| HOOK1         | 0.735601 | 7.381207 | 10.67768 | 1.54E-24 | 3.67E-23 | 44.83304 |
| ZC2HC1A       | -0.70054 | 5.559742 | -10.6667 | 1.70E-24 | 4.04E-23 | 44.73416 |
| EMCN          | -0.84098 | 6.333247 | -10.6661 | 1.71E-24 | 4.05E-23 | 44.72893 |
| PTBP2         | -0.59853 | 6.031921 | -10.6493 | 1.99E-24 | 4.70E-23 | 44.57822 |
| VSIG1         | 1.809876 | 6.959229 | 10.64855 | 2.01E-24 | 4.73E-23 | 44.57164 |
| KIAA1804      | 0.712066 | 7.591992 | 10.64803 | 2.01E-24 | 4.74E-23 | 44.56696 |
| HCK           | -0.69083 | 6.854985 | -10.6455 | 2.06E-24 | 4.84E-23 | 44.54435 |
| KCNMA1        | -0.80742 | 4.101049 | -10.6409 | 2.15E-24 | 5.04E-23 | 44.50347 |
| FAM228B       | -0.62072 | 6.186387 | -10.6382 | 2.20E-24 | 5.16E-23 | 44.47852 |
| RP11-134G8    | -0.58885 | 5.515287 | -10.6313 | 2.35E-24 | 5.48E-23 | 44.4167  |
| RAB27B        | 0.855416 | 5.443084 | 10.63094 | 2.35E-24 | 5.49E-23 | 44.41383 |
| TRPS1         | -0.71885 | 5.919531 | -10.6214 | 2.57E-24 | 5.97E-23 | 44.32814 |
| FXYD3         | 0.897101 | 9.746014 | 10.61667 | 2.68E-24 | 6.22E-23 | 44.28608 |
| PNMAL1        | -1.00152 | 4.942774 | -10.6118 | 2.80E-24 | 6.49E-23 | 44.24276 |
| TTC28         | -0.76639 | 5.96608  | -10.6083 | 2.89E-24 | 6.69E-23 | 44.2111  |
| LOC1006527    | 1.188896 | 8.231732 | 10.58909 | 3.44E-24 | 7.93E-23 | 44.03962 |
| DAAM2         | -0.71712 | 6.182118 | -10.5868 | 3.51E-24 | 8.09E-23 | 44.01894 |
| SOD3          | -0.64579 | 6.883714 | -10.5806 | 3.71E-24 | 8.53E-23 | 43.96348 |
| GPR183        | -0.77405 | 7.845507 | -10.5758 | 3.87E-24 | 8.89E-23 | 43.92083 |
| PBLD          | 0.98775  | 7.257309 | 10.57354 | 3.95E-24 | 9.04E-23 | 43.90078 |
| LOC285812     | -0.79472 | 6.402326 | -10.5652 | 4.27E-24 | 9.73E-23 | 43.82604 |
| MFAP2         | -0.82631 | 7.562995 | -10.5644 | 4.30E-24 | 9.79E-23 | 43.81901 |
| IPO11 /// LRI | -0.68421 | 5.144853 | -10.5467 | 5.04E-24 | 1.14E-22 | 43.6618  |
| CYP2S1        | 0.836907 | 6.760265 | 10.54173 | 5.27E-24 | 1.19E-22 | 43.61726 |
| RHPN2         | 0.975357 | 9.33629  | 10.54056 | 5.32E-24 | 1.21E-22 | 43.60691 |
| CAV2          | -0.86662 | 8.139632 | -10.531  | 5.81E-24 | 1.31E-22 | 43.52144 |
| ANKRD35       | -0.59563 | 5.815623 | -10.5297 | 5.87E-24 | 1.33E-22 | 43.5103  |
| LST1          | -0.58599 | 7.149483 | -10.5176 | 6.55E-24 | 1.48E-22 | 43.40252 |
| ZAK           | -0.75569 | 7.422843 | -10.4945 | 8.06E-24 | 1.80E-22 | 43.19786 |
| CGN           | 0.830189 | 7.887876 | 10.48825 | 8.52E-24 | 1.89E-22 | 43.14204 |
| TMEM45A       | -0.92496 | 8.063336 | -10.4826 | 8.97E-24 | 1.99E-22 | 43.09212 |
| AGTR1         | -0.92908 | 4.098068 | -10.4746 | 9.64E-24 | 2.13E-22 | 43.02072 |
| FBLN5         | -0.88648 | 6.853116 | -10.4681 | 1.02E-23 | 2.25E-22 | 42.96377 |
| RSPH1         | 0.775134 | 6.437593 | 10.46683 | 1.03E-23 | 2.28E-22 | 42.95212 |
| PSCA          | 1.92314  | 7.271888 | 10.46545 | 1.05E-23 | 2.30E-22 | 42.9399  |
| MST1R         | 0.742619 | 7.347565 | 10.46075 | 1.09E-23 | 2.40E-22 | 42.8983  |
| SALL2         | -0.63277 | 5.967014 | -10.4592 | 1.11E-23 | 2.43E-22 | 42.88438 |
| LINC00543 /   | 0.627256 | 4.623406 | 10.4519  | 1.18E-23 | 2.59E-22 | 42.81997 |
| FAM19A5       | -0.78707 | 4.437256 | -10.4507 | 1.19E-23 | 2.62E-22 | 42.80903 |
| IL10RA        | -0.7061  | 7.615398 | -10.4487 | 1.22E-23 | 2.66E-22 | 42.79166 |
| ELMO1         | -0.58558 | 6.087133 | -10.4398 | 1.32E-23 | 2.87E-22 | 42.71288 |

|              |          |          |          |          |          |          |
|--------------|----------|----------|----------|----------|----------|----------|
| PTK6         | 0.741434 | 7.47091  | 10.43642 | 1.36E-23 | 2.95E-22 | 42.68298 |
| TLR1         | -0.79606 | 5.620156 | -10.4325 | 1.40E-23 | 3.05E-22 | 42.64869 |
| 1-Mar        | -0.77105 | 6.136437 | -10.4302 | 1.43E-23 | 3.11E-22 | 42.62803 |
| AOX1         | -0.72476 | 5.238227 | -10.4251 | 1.50E-23 | 3.25E-22 | 42.58292 |
| MRAP2        | 1.055041 | 6.668291 | 10.41569 | 1.63E-23 | 3.52E-22 | 42.49986 |
| ARMCX2       | -0.94308 | 7.432811 | -10.4116 | 1.69E-23 | 3.64E-22 | 42.46353 |
| ETNK1        | 0.636198 | 7.788238 | 10.40083 | 1.87E-23 | 3.98E-22 | 42.36873 |
| SLA          | -0.6054  | 7.863089 | -10.396  | 1.95E-23 | 4.15E-22 | 42.32601 |
| KCTD12       | -0.80543 | 9.703769 | -10.3955 | 1.96E-23 | 4.17E-22 | 42.32186 |
| TFF1         | 2.056452 | 11.27701 | 10.38416 | 2.16E-23 | 4.60E-22 | 42.22181 |
| HSD17B2      | 1.554822 | 8.438562 | 10.3722  | 2.41E-23 | 5.11E-22 | 42.11646 |
| WASF1        | -0.88702 | 5.977439 | -10.3681 | 2.50E-23 | 5.29E-22 | 42.08052 |
| TPM1         | -0.71065 | 8.504178 | -10.3653 | 2.56E-23 | 5.42E-22 | 42.05552 |
| RASEF        | 0.896875 | 8.227139 | 10.36379 | 2.60E-23 | 5.48E-22 | 42.04247 |
| EP300-AS1    | 0.934623 | 5.586779 | 10.34708 | 3.01E-23 | 6.33E-22 | 41.89559 |
| CILP         | -1.07097 | 6.594657 | -10.3456 | 3.05E-23 | 6.39E-22 | 41.88272 |
| GKN2         | 2.892598 | 7.478612 | 10.33911 | 3.23E-23 | 6.75E-22 | 41.82552 |
| GGT6         | 0.997242 | 6.314035 | 10.33044 | 3.49E-23 | 7.27E-22 | 41.74943 |
| CENPV        | 0.705907 | 8.538737 | 10.32915 | 3.53E-23 | 7.34E-22 | 41.73811 |
| GPT2         | 0.68693  | 6.439062 | 10.32668 | 3.61E-23 | 7.49E-22 | 41.71643 |
| GPR133       | -0.99636 | 5.170147 | -10.3232 | 3.73E-23 | 7.73E-22 | 41.68546 |
| TSPAN1       | 1.211945 | 9.868485 | 10.32118 | 3.79E-23 | 7.86E-22 | 41.66815 |
| EMP1         | -0.63974 | 5.539615 | -10.3195 | 3.85E-23 | 7.97E-22 | 41.65311 |
| JAM2         | -0.94686 | 6.081784 | -10.3168 | 3.94E-23 | 8.15E-22 | 41.6301  |
| APOBEC1      | 1.142863 | 5.872909 | 10.31453 | 4.02E-23 | 8.31E-22 | 41.60981 |
| FUT3         | 0.861217 | 6.528971 | 10.30734 | 4.29E-23 | 8.84E-22 | 41.54679 |
| IL6ST        | -0.60211 | 7.007545 | -10.2875 | 5.11E-23 | 1.05E-21 | 41.37311 |
| AMIGO2       | -0.98081 | 8.493551 | -10.2808 | 5.42E-23 | 1.11E-21 | 41.3148  |
| RP11-532F1   | 0.596558 | 6.859223 | 10.27687 | 5.62E-23 | 1.14E-21 | 41.28007 |
| ARL14        | 1.46922  | 8.338059 | 10.2711  | 5.91E-23 | 1.20E-21 | 41.22958 |
| GOLT1A       | 0.877679 | 6.443852 | 10.26905 | 6.02E-23 | 1.22E-21 | 41.21165 |
| MCU          | 0.588456 | 8.764234 | 10.26707 | 6.13E-23 | 1.24E-21 | 41.19435 |
| C3           | -1.07673 | 10.51139 | -10.2654 | 6.22E-23 | 1.26E-21 | 41.1794  |
| CLIP4        | -0.59976 | 5.949312 | -10.2586 | 6.60E-23 | 1.33E-21 | 41.12019 |
| OGN          | -1.86527 | 5.708408 | -10.2549 | 6.83E-23 | 1.37E-21 | 41.08761 |
| PI15         | -0.79444 | 5.361155 | -10.2524 | 6.98E-23 | 1.40E-21 | 41.06589 |
| SLC24A3      | -0.83223 | 6.832869 | -10.2475 | 7.28E-23 | 1.46E-21 | 41.02355 |
| AL832909 /// | -0.76188 | 6.780745 | -10.2468 | 7.33E-23 | 1.47E-21 | 41.0177  |
| SGPP2        | 0.845391 | 6.961234 | 10.24458 | 7.47E-23 | 1.49E-21 | 40.998   |
| CYYR1        | -0.69135 | 6.446115 | -10.2445 | 7.48E-23 | 1.49E-21 | 40.99729 |
| CHMP4C       | 0.809449 | 8.992919 | 10.24252 | 7.61E-23 | 1.52E-21 | 40.98001 |
| HAS2         | -0.78881 | 5.78031  | -10.2332 | 8.26E-23 | 1.64E-21 | 40.89874 |
| CAPN8        | 1.311499 | 7.557603 | 10.2255  | 8.85E-23 | 1.75E-21 | 40.83154 |
| GSTA1        | 0.898204 | 6.616462 | 10.22116 | 9.19E-23 | 1.81E-21 | 40.79377 |
| ST8SIA4      | -0.66419 | 5.46037  | -10.2171 | 9.53E-23 | 1.87E-21 | 40.75845 |
| RAPGEFL1     | 0.649981 | 6.834098 | 10.21109 | 1.00E-22 | 1.97E-21 | 40.70607 |
| BTNL8        | 1.200986 | 6.866126 | 10.19343 | 1.17E-22 | 2.30E-21 | 40.55238 |
| EPS8L1       | 0.629098 | 6.928478 | 10.18889 | 1.22E-22 | 2.39E-21 | 40.51294 |
| SH3BGRL      | -0.6487  | 9.843701 | -10.1827 | 1.29E-22 | 2.52E-21 | 40.45935 |
| SLC39A11     | 0.586088 | 8.332757 | 10.1818  | 1.30E-22 | 2.54E-21 | 40.45132 |
| GCNT1        | 0.892654 | 7.150517 | 10.17579 | 1.37E-22 | 2.67E-21 | 40.39909 |
| PLEK         | -0.68935 | 7.059738 | -10.1365 | 1.94E-22 | 3.72E-21 | 40.05847 |
| CDHR2        | 0.783028 | 7.097521 | 10.1348  | 1.97E-22 | 3.77E-21 | 40.04362 |
| STEAP4       | -0.78651 | 5.297467 | -10.1333 | 1.99E-22 | 3.81E-21 | 40.03109 |
| LOXL1        | -0.7624  | 7.488256 | -10.1317 | 2.02E-22 | 3.86E-21 | 40.01707 |
| MFAP5        | -1.20816 | 6.083755 | -10.1311 | 2.03E-22 | 3.88E-21 | 40.01194 |
| TSPAN2       | -0.73725 | 5.003405 | -10.1256 | 2.13E-22 | 4.06E-21 | 39.96366 |
| MIR143HG //  | -0.75538 | 5.954913 | -10.115  | 2.34E-22 | 4.44E-21 | 39.8723  |



|              |          |          |          |          |          |          |
|--------------|----------|----------|----------|----------|----------|----------|
| SUSD5        | -0.66161 | 3.397274 | -10.1123 | 2.39E-22 | 4.54E-21 | 39.84905 |
| NAMPT        | -0.62213 | 9.079536 | -10.1083 | 2.48E-22 | 4.68E-21 | 39.81465 |
| SOWAHA       | 1.092082 | 6.681305 | 10.10788 | 2.49E-22 | 4.70E-21 | 39.81078 |
| TMPRSS4      | 0.888894 | 8.48399  | 10.10659 | 2.52E-22 | 4.74E-21 | 39.79966 |
| ZG16B        | 1.383698 | 8.129875 | 10.10393 | 2.58E-22 | 4.85E-21 | 39.77663 |
| FOXA1        | 0.669566 | 4.935449 | 10.10138 | 2.63E-22 | 4.95E-21 | 39.75459 |
| HCLS1        | -0.72129 | 7.849183 | -10.0978 | 2.72E-22 | 5.10E-21 | 39.72385 |
| ESRP1        | 0.817769 | 9.239683 | 10.07454 | 3.33E-22 | 6.22E-21 | 39.52293 |
| FYB          | -0.5957  | 6.058419 | -10.0669 | 3.56E-22 | 6.64E-21 | 39.4571  |
| MFAP4        | -0.95813 | 7.060301 | -10.0542 | 3.98E-22 | 7.39E-21 | 39.34798 |
| PCDHB10 ///  | -0.83304 | 4.832654 | -10.0519 | 4.06E-22 | 7.53E-21 | 39.32772 |
| TMEM35       | -0.99318 | 4.428857 | -10.0513 | 4.08E-22 | 7.56E-21 | 39.32288 |
| TM4SF5       | 0.959431 | 7.514863 | 10.04603 | 4.27E-22 | 7.89E-21 | 39.27739 |
| NUPR1        | -0.84462 | 8.205935 | -10.0449 | 4.31E-22 | 7.96E-21 | 39.26756 |
| ASB5         | -1.15425 | 3.314926 | -10.0445 | 4.33E-22 | 7.98E-21 | 39.26432 |
| TGFBR1       | -0.67266 | 5.902789 | -10.0397 | 4.51E-22 | 8.31E-21 | 39.22321 |
| MLPH         | 0.992074 | 9.596836 | 10.03787 | 4.59E-22 | 8.44E-21 | 39.20714 |
| F8           | -0.7151  | 6.558173 | -10.0346 | 4.72E-22 | 8.66E-21 | 39.17878 |
| SCGB2A1      | 1.60224  | 5.365398 | 10.03258 | 4.80E-22 | 8.79E-21 | 39.16166 |
| AKR1C1 /// / | 1.164863 | 4.858325 | 10.0275  | 5.02E-22 | 9.15E-21 | 39.11804 |
| MS4A6A       | -0.73959 | 8.371133 | -10.0275 | 5.02E-22 | 9.15E-21 | 39.11774 |
| MEOX1        | -0.76899 | 6.154994 | -10.0261 | 5.08E-22 | 9.26E-21 | 39.10555 |
| CYTL1        | -0.58914 | 4.74095  | -10.0185 | 5.43E-22 | 9.85E-21 | 39.04063 |
| PDE1A        | -0.59751 | 4.079616 | -10.0155 | 5.57E-22 | 1.01E-20 | 39.01454 |
| CLDN23       | 0.929262 | 6.474256 | 10.00108 | 6.32E-22 | 1.14E-20 | 38.89121 |
| PPARG        | 0.786429 | 8.044241 | 9.99991  | 6.38E-22 | 1.15E-20 | 38.88114 |
| ITIH5        | -0.75754 | 6.09312  | -9.99461 | 6.68E-22 | 1.20E-20 | 38.83567 |
| ANXA10       | 2.078582 | 9.422407 | 9.985889 | 7.21E-22 | 1.29E-20 | 38.76094 |
| PRSS3P2      | 0.698419 | 8.049742 | 9.975748 | 7.87E-22 | 1.40E-20 | 38.67408 |
| FMO5         | 0.676378 | 5.028393 | 9.975629 | 7.88E-22 | 1.40E-20 | 38.67307 |
| CSRP1        | -0.72478 | 10.11328 | -9.97352 | 8.02E-22 | 1.42E-20 | 38.65501 |
| ATP1A2       | -0.87029 | 4.407627 | -9.96441 | 8.68E-22 | 1.54E-20 | 38.57705 |
| GRHL2        | 0.639369 | 7.947887 | 9.963933 | 8.72E-22 | 1.54E-20 | 38.57297 |
| SMAGP        | 0.604134 | 8.85562  | 9.957209 | 9.24E-22 | 1.63E-20 | 38.51547 |
| MAN1C1       | -0.70059 | 6.407623 | -9.95143 | 9.72E-22 | 1.71E-20 | 38.46608 |
| NR2F1        | -0.94767 | 7.320433 | -9.9426  | 1.05E-21 | 1.84E-20 | 38.39058 |
| SMTN         | -0.83561 | 6.561867 | -9.94047 | 1.07E-21 | 1.87E-20 | 38.37246 |
| SGCE         | -0.95003 | 7.765427 | -9.93698 | 1.10E-21 | 1.93E-20 | 38.34262 |
| OLR1         | -1.03874 | 5.103291 | -9.91613 | 1.32E-21 | 2.29E-20 | 38.16477 |
| PLAGL1       | -0.81447 | 7.32842  | -9.91579 | 1.32E-21 | 2.30E-20 | 38.16182 |
| RASSF6       | 0.974378 | 6.491633 | 9.911085 | 1.38E-21 | 2.39E-20 | 38.12175 |
| TMTC1        | -0.63539 | 5.728967 | -9.90381 | 1.47E-21 | 2.54E-20 | 38.05973 |
| TCEAL2       | -1.21504 | 4.671601 | -9.89759 | 1.55E-21 | 2.67E-20 | 38.00681 |
| PPP1R14A     | -0.99328 | 6.481156 | -9.89495 | 1.58E-21 | 2.73E-20 | 37.98432 |
| RAB11FIP1    | 0.590568 | 8.941093 | 9.891804 | 1.63E-21 | 2.81E-20 | 37.95756 |
| ITGB2        | -0.68335 | 7.068694 | -9.88724 | 1.69E-21 | 2.92E-20 | 37.91871 |
| SAMSN1       | -0.73371 | 7.571031 | -9.88487 | 1.73E-21 | 2.97E-20 | 37.89858 |
| CTSO         | -0.66467 | 7.824707 | -9.8784  | 1.83E-21 | 3.14E-20 | 37.84358 |
| TMPRSS2      | 0.720992 | 7.488458 | 9.865258 | 2.04E-21 | 3.50E-20 | 37.73187 |
| PPP1R14D     | 0.944938 | 6.871184 | 9.862912 | 2.09E-21 | 3.57E-20 | 37.71195 |
| LOC729970    | -0.59379 | 4.339388 | -9.85999 | 2.14E-21 | 3.65E-20 | 37.68714 |
| ANGPT1       | -0.72986 | 5.52007  | -9.85695 | 2.20E-21 | 3.74E-20 | 37.66132 |
| NPTX2        | -0.73953 | 4.532426 | -9.85383 | 2.26E-21 | 3.84E-20 | 37.63489 |
| C3orf70      | -0.97151 | 6.157055 | -9.8528  | 2.28E-21 | 3.87E-20 | 37.62608 |
| NAPRT        | 0.61864  | 8.752828 | 9.851302 | 2.31E-21 | 3.91E-20 | 37.6134  |
| GKN1         | 2.984021 | 7.925445 | 9.849203 | 2.35E-21 | 3.98E-20 | 37.5956  |
| HSPB6        | -0.80365 | 4.895594 | -9.84908 | 2.35E-21 | 3.98E-20 | 37.59452 |
| SETBP1       | -0.95203 | 6.023931 | -9.84708 | 2.39E-21 | 4.05E-20 | 37.57755 |

|              |          |          |          |          |          |          |
|--------------|----------|----------|----------|----------|----------|----------|
| CES2         | 0.847923 | 9.125662 | 9.8334   | 2.69E-21 | 4.55E-20 | 37.46162 |
| F2RL1        | 0.818327 | 8.437646 | 9.819217 | 3.04E-21 | 5.12E-20 | 37.3415  |
| SLC28A2      | 0.752272 | 4.531873 | 9.795361 | 3.73E-21 | 6.22E-20 | 37.13976 |
| AGR3         | 1.631757 | 10.06769 | 9.772373 | 4.54E-21 | 7.51E-20 | 36.9457  |
| NR1I2        | 0.67329  | 5.591748 | 9.770319 | 4.62E-21 | 7.63E-20 | 36.92837 |
| MYH11        | -1.18186 | 5.657945 | -9.76198 | 4.96E-21 | 8.16E-20 | 36.85808 |
| ARMCX5-GP    | -0.6478  | 6.996718 | -9.75629 | 5.20E-21 | 8.56E-20 | 36.81014 |
| SLAMF8       | -0.63291 | 6.380619 | -9.75332 | 5.34E-21 | 8.77E-20 | 36.78512 |
| SHROOM3      | 0.627596 | 8.343219 | 9.746072 | 5.68E-21 | 9.31E-20 | 36.72407 |
| SCN7A        | -0.78825 | 3.533521 | -9.74144 | 5.91E-21 | 9.64E-20 | 36.68508 |
| MCTP1        | -0.72915 | 5.728326 | -9.73548 | 6.22E-21 | 1.01E-19 | 36.63491 |
| GMDS         | 0.918135 | 8.797303 | 9.73296  | 6.35E-21 | 1.03E-19 | 36.61375 |
| FAXC         | -0.68416 | 3.872643 | -9.72954 | 6.54E-21 | 1.06E-19 | 36.58497 |
| TOX3         | 1.129321 | 8.62167  | 9.719774 | 7.11E-21 | 1.15E-19 | 36.50291 |
| COL21A1      | -0.96506 | 5.777375 | -9.71175 | 7.61E-21 | 1.22E-19 | 36.43548 |
| RNF183       | 0.842387 | 6.264844 | 9.702244 | 8.25E-21 | 1.32E-19 | 36.35573 |
| SLMAP        | -0.77153 | 6.255073 | -9.69137 | 9.05E-21 | 1.44E-19 | 36.26455 |
| IRF6         | 0.739642 | 6.289144 | 9.69111  | 9.07E-21 | 1.44E-19 | 36.26234 |
| SLC41A2      | 0.649235 | 6.986168 | 9.685491 | 9.51E-21 | 1.51E-19 | 36.21525 |
| DFNA5        | -0.81387 | 7.654124 | -9.68224 | 9.78E-21 | 1.56E-19 | 36.18803 |
| PIGR         | 1.329092 | 9.402789 | 9.671842 | 1.07E-20 | 1.70E-19 | 36.10093 |
| SFRP1        | -0.73907 | 4.822877 | -9.6689  | 1.10E-20 | 1.74E-19 | 36.07634 |
| HAPLN1       | 0.660929 | 4.167136 | 9.668726 | 1.10E-20 | 1.74E-19 | 36.07485 |
| KRT8         | 0.768772 | 11.47899 | 9.653918 | 1.24E-20 | 1.96E-19 | 35.95099 |
| LRR31        | 1.114122 | 5.94482  | 9.653581 | 1.25E-20 | 1.97E-19 | 35.94817 |
| CTB-167B5.2  | -0.65126 | 3.975244 | -9.64589 | 1.33E-20 | 2.09E-19 | 35.88391 |
| FBLN1        | -0.92301 | 7.005416 | -9.64435 | 1.35E-20 | 2.12E-19 | 35.87101 |
| PPAPDC1A     | -0.84391 | 5.058849 | -9.64017 | 1.40E-20 | 2.19E-19 | 35.83609 |
| MPEG1        | -0.76169 | 7.955338 | -9.63964 | 1.40E-20 | 2.20E-19 | 35.83174 |
| GALNT7       | 0.602925 | 9.485922 | 9.638045 | 1.42E-20 | 2.23E-19 | 35.81837 |
| SELENBP1     | 0.810664 | 8.074698 | 9.63499  | 1.46E-20 | 2.29E-19 | 35.79287 |
| BLVRA        | -0.59796 | 6.494661 | -9.62937 | 1.53E-20 | 2.40E-19 | 35.74596 |
| LOC283070    | -0.60078 | 6.226739 | -9.61703 | 1.70E-20 | 2.65E-19 | 35.64301 |
| LINC00341 /, | -0.65147 | 6.584961 | -9.6133  | 1.75E-20 | 2.73E-19 | 35.61194 |
| SLC44A3      | 0.68628  | 8.052132 | 9.597835 | 2.00E-20 | 3.10E-19 | 35.48316 |
| FHL1         | -1.26859 | 7.270322 | -9.59075 | 2.12E-20 | 3.28E-19 | 35.42419 |
| NRXN3        | -0.8459  | 5.149091 | -9.58902 | 2.15E-20 | 3.33E-19 | 35.40979 |
| LINC00483    | 1.134933 | 5.960858 | 9.587023 | 2.19E-20 | 3.38E-19 | 35.3932  |
| ACTC1        | -0.78152 | 7.061669 | -9.58582 | 2.21E-20 | 3.41E-19 | 35.38321 |
| BHMT2        | -0.68631 | 4.174829 | -9.58119 | 2.30E-20 | 3.54E-19 | 35.3447  |
| C1QA         | -0.69959 | 8.212144 | -9.57825 | 2.36E-20 | 3.63E-19 | 35.32024 |
| IGDCC4       | -0.74775 | 5.886071 | -9.5681  | 2.57E-20 | 3.95E-19 | 35.23597 |
| CPE          | -1.08253 | 7.649348 | -9.56269 | 2.69E-20 | 4.13E-19 | 35.19102 |
| LYVE1        | -0.73209 | 4.52142  | -9.55903 | 2.77E-20 | 4.25E-19 | 35.16065 |
| TFCP2L1      | 0.618763 | 6.291267 | 9.556271 | 2.84E-20 | 4.34E-19 | 35.13774 |
| TMEM97       | 0.6505   | 9.2065   | 9.547654 | 3.05E-20 | 4.65E-19 | 35.06627 |
| RTN1         | -0.74847 | 5.419616 | -9.53719 | 3.33E-20 | 5.05E-19 | 34.97955 |
| OCLN         | 0.672262 | 7.305204 | 9.534664 | 3.40E-20 | 5.15E-19 | 34.95862 |
| TFEC         | -0.73418 | 5.041503 | -9.51462 | 4.02E-20 | 6.06E-19 | 34.79272 |
| ENPEP        | -0.75037 | 5.033217 | -9.51213 | 4.11E-20 | 6.18E-19 | 34.77211 |
| KRTCAP3      | 0.740062 | 8.49569  | 9.502297 | 4.46E-20 | 6.68E-19 | 34.69085 |
| LCN2         | 1.552742 | 11.02418 | 9.497963 | 4.63E-20 | 6.92E-19 | 34.65505 |
| CDH1         | 0.765337 | 8.263913 | 9.491826 | 4.87E-20 | 7.26E-19 | 34.60437 |
| CYS1         | -0.85585 | 4.928998 | -9.47604 | 5.56E-20 | 8.27E-19 | 34.47417 |
| ANG          | 0.767918 | 8.235255 | 9.470567 | 5.82E-20 | 8.65E-19 | 34.42901 |
| ABCA6        | -0.60291 | 4.034777 | -9.46905 | 5.89E-20 | 8.75E-19 | 34.41651 |
| PPP1R36      | 0.691299 | 6.459952 | 9.466141 | 6.04E-20 | 8.95E-19 | 34.39254 |
| NAT1         | 0.62359  | 8.56645  | 9.44395  | 7.27E-20 | 1.07E-18 | 34.20987 |

|              |          |          |          |          |          |          |
|--------------|----------|----------|----------|----------|----------|----------|
| ALOX5AP      | -0.7549  | 8.611646 | -9.44357 | 7.29E-20 | 1.07E-18 | 34.20678 |
| IRX5         | 0.674383 | 4.706112 | 9.434471 | 7.87E-20 | 1.15E-18 | 34.13194 |
| CPED1        | -0.70031 | 6.759404 | -9.43392 | 7.90E-20 | 1.16E-18 | 34.12742 |
| PGM5-AS1     | -0.90308 | 5.446149 | -9.4212  | 8.79E-20 | 1.28E-18 | 34.02296 |
| GGTA1P       | -0.8147  | 6.785705 | -9.40962 | 9.67E-20 | 1.41E-18 | 33.9279  |
| C1orf106     | 0.79408  | 9.522263 | 9.405004 | 1.01E-19 | 1.46E-18 | 33.89006 |
| FAM216A      | -0.60415 | 6.445593 | -9.39962 | 1.05E-19 | 1.53E-18 | 33.84595 |
| CAPN13       | 0.909814 | 4.473974 | 9.395344 | 1.09E-19 | 1.58E-18 | 33.81088 |
| SPINT2       | 0.617684 | 10.77124 | 9.385604 | 1.18E-19 | 1.71E-18 | 33.73111 |
| TUSC3        | -0.63956 | 4.350651 | -9.37461 | 1.29E-19 | 1.87E-18 | 33.64118 |
| AOC1         | 1.344378 | 8.004258 | 9.371887 | 1.32E-19 | 1.91E-18 | 33.61888 |
| AKR1C4       | 0.799911 | 4.463247 | 9.366329 | 1.39E-19 | 1.99E-18 | 33.57344 |
| VIP          | -1.1109  | 3.682815 | -9.36365 | 1.42E-19 | 2.04E-18 | 33.55152 |
| GDA          | 0.828352 | 6.257467 | 9.354857 | 1.52E-19 | 2.18E-18 | 33.47971 |
| RCSD1        | -0.65586 | 6.385048 | -9.34937 | 1.60E-19 | 2.28E-18 | 33.4349  |
| DSP          | 0.70234  | 10.74652 | 9.347446 | 1.62E-19 | 2.32E-18 | 33.41921 |
| CYSLTR1      | -0.66957 | 5.09825  | -9.3421  | 1.69E-19 | 2.41E-18 | 33.37558 |
| RHBDL2       | 0.776794 | 5.750456 | 9.340664 | 1.71E-19 | 2.44E-18 | 33.36388 |
| SDC1         | 0.614022 | 9.091027 | 9.323978 | 1.97E-19 | 2.79E-18 | 33.22786 |
| CALML4       | 0.596138 | 6.12738  | 9.323591 | 1.97E-19 | 2.80E-18 | 33.2247  |
| MAL2         | 0.875502 | 11.05841 | 9.322935 | 1.99E-19 | 2.81E-18 | 33.21936 |
| LYPD6B       | 0.993083 | 6.751316 | 9.320332 | 2.03E-19 | 2.86E-18 | 33.19816 |
| GCNT3        | 1.266903 | 9.612732 | 9.317899 | 2.07E-19 | 2.92E-18 | 33.17835 |
| CYP2C9       | 0.762696 | 5.828795 | 9.317054 | 2.08E-19 | 2.93E-18 | 33.17147 |
| CA2          | 1.49191  | 10.28025 | 9.315312 | 2.11E-19 | 2.97E-18 | 33.15729 |
| RP11-389C8   | -0.6092  | 5.584006 | -9.31125 | 2.19E-19 | 3.07E-18 | 33.12423 |
| CASQ2        | -0.93464 | 5.401397 | -9.30815 | 2.24E-19 | 3.14E-18 | 33.09896 |
| RRAD         | -0.5895  | 5.142977 | -9.29877 | 2.42E-19 | 3.38E-18 | 33.02269 |
| SLFN11       | -0.67154 | 6.991221 | -9.29844 | 2.43E-19 | 3.39E-18 | 33.02004 |
| TC2N         | 0.698766 | 7.887442 | 9.2941   | 2.52E-19 | 3.51E-18 | 32.98476 |
| SNRPN /// SI | -0.68093 | 7.073065 | -9.2909  | 2.59E-19 | 3.60E-18 | 32.95878 |
| FCN1         | -0.6013  | 5.276648 | -9.2717  | 3.03E-19 | 4.20E-18 | 32.80291 |
| PLEK2        | 0.690184 | 8.928265 | 9.268776 | 3.10E-19 | 4.29E-18 | 32.77918 |
| HOXB2        | -0.59213 | 7.545542 | -9.26235 | 3.27E-19 | 4.52E-18 | 32.72707 |
| C1QC         | -0.66285 | 8.676437 | -9.25073 | 3.60E-19 | 4.96E-18 | 32.63296 |
| TCEAL3       | -0.63619 | 8.257821 | -9.24411 | 3.80E-19 | 5.22E-18 | 32.57931 |
| PTPRC        | -0.80256 | 7.808659 | -9.24222 | 3.86E-19 | 5.30E-18 | 32.56406 |
| ICAM1        | -0.68334 | 6.922246 | -9.2313  | 4.22E-19 | 5.78E-18 | 32.47568 |
| S100P        | 1.225785 | 11.97213 | 9.217921 | 4.71E-19 | 6.42E-18 | 32.36761 |
| ACTG2        | -0.69589 | 7.21222  | -9.21467 | 4.84E-19 | 6.58E-18 | 32.34133 |
| HLF          | -0.74248 | 4.420305 | -9.21171 | 4.96E-19 | 6.74E-18 | 32.31747 |
| NR4A3        | -0.61821 | 4.800922 | -9.2096  | 5.04E-19 | 6.84E-18 | 32.30041 |
| PGC          | 2.205644 | 9.323164 | 9.184054 | 6.22E-19 | 8.36E-18 | 32.09448 |
| ABHD17C      | 0.611555 | 9.484614 | 9.174375 | 6.73E-19 | 9.03E-18 | 32.01656 |
| DES          | -0.70668 | 5.154274 | -9.1561  | 7.81E-19 | 1.04E-17 | 31.86959 |
| C6orf58      | 1.379794 | 4.936522 | 9.1444   | 8.59E-19 | 1.14E-17 | 31.77565 |
| F13A1        | -0.99667 | 6.851933 | -9.1371  | 9.12E-19 | 1.21E-17 | 31.71708 |
| SLC5A1       | 0.808788 | 6.544541 | 9.125985 | 9.98E-19 | 1.32E-17 | 31.62794 |
| HSD11B2      | 0.707075 | 5.984024 | 9.122124 | 1.03E-18 | 1.37E-17 | 31.597   |
| BIK          | 0.793187 | 9.200027 | 9.114468 | 1.10E-18 | 1.45E-17 | 31.53567 |
| STYK1        | 0.743288 | 5.986846 | 9.110586 | 1.13E-18 | 1.49E-17 | 31.50459 |
| FRZB         | -0.69969 | 5.450764 | -9.09729 | 1.26E-18 | 1.65E-17 | 31.39825 |
| IFIT2        | -0.67677 | 7.068364 | -9.09514 | 1.28E-18 | 1.68E-17 | 31.38102 |
| ASB2         | -0.67944 | 5.448652 | -9.09503 | 1.28E-18 | 1.68E-17 | 31.38019 |
| STX19        | 0.714495 | 5.123181 | 9.090304 | 1.33E-18 | 1.74E-17 | 31.34238 |
| RGS2         | -0.70039 | 10.44808 | -9.07933 | 1.46E-18 | 1.90E-17 | 31.25473 |
| UGT2B15      | 1.148439 | 6.012414 | 9.064487 | 1.64E-18 | 2.14E-17 | 31.1363  |
| PRSS16       | 0.715078 | 6.47338  | 9.046042 | 1.91E-18 | 2.48E-17 | 30.98934 |

|              |          |          |          |          |          |          |
|--------------|----------|----------|----------|----------|----------|----------|
| PRSS2        | 0.895601 | 7.567286 | 9.040822 | 1.99E-18 | 2.58E-17 | 30.94779 |
| FOXQ1        | 1.010939 | 10.91907 | 9.037465 | 2.05E-18 | 2.64E-17 | 30.92108 |
| PLAU         | -0.71669 | 7.586634 | -9.02937 | 2.18E-18 | 2.82E-17 | 30.85668 |
| SNX10        | -0.6654  | 8.268493 | -9.02563 | 2.25E-18 | 2.90E-17 | 30.82699 |
| CCDC146      | -0.69573 | 5.781943 | -9.01242 | 2.50E-18 | 3.21E-17 | 30.72203 |
| RRAGD        | -0.6726  | 6.898218 | -9.01033 | 2.55E-18 | 3.26E-17 | 30.70544 |
| DES /// SUPT | -1.141   | 8.029729 | -8.99548 | 2.87E-18 | 3.66E-17 | 30.58766 |
| BMPR1B       | -0.62377 | 4.191775 | -8.99279 | 2.93E-18 | 3.74E-17 | 30.56632 |
| SMOC2        | -0.81807 | 6.704442 | -8.99221 | 2.95E-18 | 3.75E-17 | 30.56176 |
| C7           | -1.03076 | 5.399065 | -8.99028 | 2.99E-18 | 3.81E-17 | 30.54645 |
| LOC1027242   | 0.648475 | 7.618235 | 8.98998  | 3.00E-18 | 3.82E-17 | 30.54408 |
| JUP          | 0.69566  | 9.378212 | 8.986602 | 3.08E-18 | 3.91E-17 | 30.51731 |
| ZNF331       | -0.65639 | 6.628815 | -8.97968 | 3.26E-18 | 4.13E-17 | 30.46247 |
| GPX2         | 0.765135 | 8.289235 | 8.974859 | 3.39E-18 | 4.28E-17 | 30.42434 |
| CCL4         | -0.80939 | 8.416563 | -8.97431 | 3.40E-18 | 4.30E-17 | 30.41998 |
| C6orf132     | 0.606951 | 6.224302 | 8.971846 | 3.47E-18 | 4.38E-17 | 30.4005  |
| DUOX2        | 1.482382 | 7.08521  | 8.970368 | 3.51E-18 | 4.43E-17 | 30.38881 |
| CCDC102B     | -0.64586 | 4.875859 | -8.95785 | 3.88E-18 | 4.87E-17 | 30.2898  |
| LOC440934    | -0.63208 | 3.521797 | -8.95595 | 3.94E-18 | 4.95E-17 | 30.27484 |
| AHNAK2       | -0.86443 | 6.271937 | -8.93618 | 4.62E-18 | 5.77E-17 | 30.11878 |
| BPIFB1       | 1.821022 | 8.109917 | 8.923185 | 5.13E-18 | 6.38E-17 | 30.01634 |
| DUOXA2       | 0.890027 | 7.010549 | 8.916528 | 5.41E-18 | 6.72E-17 | 29.96391 |
| AX746755 //  | -0.59289 | 5.062557 | -8.90522 | 5.92E-18 | 7.33E-17 | 29.87494 |
| CXCL17       | 1.39735  | 7.482097 | 8.885818 | 6.91E-18 | 8.51E-17 | 29.72243 |
| FCGR3A /// F | -1.0455  | 6.640753 | -8.8756  | 7.50E-18 | 9.21E-17 | 29.64222 |
| C1QB         | -0.76839 | 8.910407 | -8.86272 | 8.31E-18 | 1.02E-16 | 29.54123 |
| MYOT         | -0.68282 | 3.427779 | -8.86144 | 8.39E-18 | 1.03E-16 | 29.53121 |
| MUC13        | 1.024512 | 8.991144 | 8.85383  | 8.91E-18 | 1.09E-16 | 29.47159 |
| SYNPO2       | -1.41303 | 7.415102 | -8.84569 | 9.51E-18 | 1.16E-16 | 29.40787 |
| TLR8         | -0.58754 | 5.249297 | -8.83034 | 1.07E-17 | 1.30E-16 | 29.28785 |
| CD24         | 0.80183  | 11.16587 | 8.823755 | 1.13E-17 | 1.37E-16 | 29.23638 |
| C4A /// C4B  | -0.75947 | 8.274588 | -8.81986 | 1.17E-17 | 1.41E-16 | 29.20597 |
| GATA6-AS1    | 0.754413 | 6.385431 | 8.819599 | 1.17E-17 | 1.41E-16 | 29.20393 |
| MIR155 /// M | -0.69668 | 5.22255  | -8.81112 | 1.25E-17 | 1.51E-16 | 29.13778 |
| LIPH         | 0.745288 | 6.999142 | 8.79911  | 1.38E-17 | 1.65E-16 | 29.04411 |
| KCTD14 /// P | 0.710269 | 7.293094 | 8.797382 | 1.40E-17 | 1.67E-16 | 29.03064 |
| CD44         | -0.62861 | 7.725288 | -8.78283 | 1.57E-17 | 1.87E-16 | 28.91731 |
| P2RY13       | -0.65185 | 4.824451 | -8.77826 | 1.62E-17 | 1.94E-16 | 28.88174 |
| IGF1         | -0.9306  | 6.006494 | -8.77329 | 1.69E-17 | 2.01E-16 | 28.84315 |
| DSG2         | 0.787431 | 9.596516 | 8.76921  | 1.74E-17 | 2.08E-16 | 28.8114  |
| SOSTDC1      | 1.381489 | 6.14339  | 8.76851  | 1.75E-17 | 2.09E-16 | 28.80596 |
| LINC00702    | -0.83646 | 3.751752 | -8.76529 | 1.80E-17 | 2.14E-16 | 28.78094 |
| MUC17        | 0.748041 | 5.912465 | 8.761922 | 1.85E-17 | 2.19E-16 | 28.75477 |
| CYP2J2       | 0.683207 | 6.46293  | 8.757275 | 1.92E-17 | 2.27E-16 | 28.71868 |
| TACR2        | -0.70968 | 5.224598 | -8.75376 | 1.97E-17 | 2.33E-16 | 28.69136 |
| TNFSF13B     | -0.70891 | 8.372607 | -8.7533  | 1.98E-17 | 2.34E-16 | 28.68781 |
| FZD7         | -0.76681 | 7.112647 | -8.74956 | 2.04E-17 | 2.41E-16 | 28.65879 |
| POSTN        | -0.59142 | 6.390634 | -8.73552 | 2.27E-17 | 2.67E-16 | 28.54993 |
| ATP2C2       | 0.671919 | 6.269837 | 8.735503 | 2.27E-17 | 2.67E-16 | 28.54979 |
| PRKAR2B      | -0.92292 | 7.255106 | -8.73527 | 2.28E-17 | 2.68E-16 | 28.54799 |
| AGMAT        | 0.626467 | 6.423175 | 8.722469 | 2.52E-17 | 2.95E-16 | 28.44885 |
| CFH          | -0.92202 | 7.931489 | -8.7199  | 2.57E-17 | 3.01E-16 | 28.42899 |
| CCL3 /// CCL | -0.96812 | 7.632721 | -8.71796 | 2.61E-17 | 3.05E-16 | 28.41394 |
| MISP         | 0.623472 | 9.324331 | 8.712556 | 2.72E-17 | 3.18E-16 | 28.37215 |
| NKX3-2       | -0.60051 | 4.832816 | -8.69957 | 3.02E-17 | 3.52E-16 | 28.2718  |
| PSAPL1       | 0.661468 | 6.45855  | 8.698587 | 3.04E-17 | 3.54E-16 | 28.26419 |
| LSR          | 0.615634 | 9.323896 | 8.696777 | 3.08E-17 | 3.59E-16 | 28.25021 |
| EGR3         | -0.83626 | 6.999016 | -8.69656 | 3.09E-17 | 3.59E-16 | 28.2485  |

|             |          |          |          |          |          |          |
|-------------|----------|----------|----------|----------|----------|----------|
| AF070581    | -0.63793 | 4.140215 | -8.6908  | 3.23E-17 | 3.75E-16 | 28.20403 |
| MUC1        | 0.930412 | 9.934088 | 8.675211 | 3.65E-17 | 4.22E-16 | 28.08383 |
| FOXF1       | -0.74915 | 8.304782 | -8.67168 | 3.75E-17 | 4.34E-16 | 28.05664 |
| GIMAP7      | -0.75673 | 7.239758 | -8.66711 | 3.89E-17 | 4.48E-16 | 28.02138 |
| IL7R        | -0.68815 | 8.223223 | -8.66185 | 4.05E-17 | 4.67E-16 | 27.98089 |
| TMEM255A    | -0.80927 | 4.341734 | -8.66077 | 4.09E-17 | 4.71E-16 | 27.97262 |
| PCDHB14     | -0.69269 | 5.253515 | -8.65214 | 4.37E-17 | 5.01E-16 | 27.90619 |
| CTSE        | 1.473484 | 10.76122 | 8.651137 | 4.41E-17 | 5.05E-16 | 27.89846 |
| GPR34       | -0.81499 | 6.934053 | -8.6491  | 4.48E-17 | 5.13E-16 | 27.88277 |
| SELE        | -1.00625 | 5.218043 | -8.64731 | 4.54E-17 | 5.19E-16 | 27.86907 |
| PLP1        | -0.85893 | 3.855646 | -8.64146 | 4.75E-17 | 5.42E-16 | 27.82408 |
| TMC5        | 0.901467 | 8.858126 | 8.639789 | 4.82E-17 | 5.48E-16 | 27.81124 |
| KLF5        | 0.721876 | 9.79614  | 8.616496 | 5.78E-17 | 6.53E-16 | 27.63246 |
| ENO2        | -0.61223 | 6.244052 | -8.61603 | 5.80E-17 | 6.55E-16 | 27.62886 |
| RCAN2       | -0.86362 | 7.653798 | -8.60249 | 6.44E-17 | 7.24E-16 | 27.52513 |
| RNASE6      | -0.67524 | 7.669238 | -8.60024 | 6.55E-17 | 7.36E-16 | 27.5079  |
| SH3BGR      | -0.61663 | 5.760128 | -8.59751 | 6.70E-17 | 7.51E-16 | 27.487   |
| COL11A1     | -1.36592 | 6.186807 | -8.58752 | 7.24E-17 | 8.07E-16 | 27.41062 |
| RP11-1L12.3 | 0.772715 | 6.072285 | 8.574341 | 8.02E-17 | 8.90E-16 | 27.30989 |
| ACSL5       | 0.660669 | 9.128018 | 8.574096 | 8.03E-17 | 8.91E-16 | 27.30802 |
| FOXA2       | 0.768598 | 6.72068  | 8.55872  | 9.05E-17 | 1.00E-15 | 27.19067 |
| RBP7        | -0.63245 | 6.096905 | -8.55176 | 9.55E-17 | 1.05E-15 | 27.13763 |
| AADAC       | 1.247546 | 7.447401 | 8.550363 | 9.65E-17 | 1.06E-15 | 27.12696 |
| CLDN18      | 1.607372 | 8.99276  | 8.54183  | 1.03E-16 | 1.13E-15 | 27.06196 |
| ZWINT       | 0.598475 | 9.677596 | 8.538421 | 1.06E-16 | 1.16E-15 | 27.03601 |
| PTN         | -0.72923 | 6.484324 | -8.52009 | 1.22E-16 | 1.33E-15 | 26.89662 |
| SULF2       | -0.59128 | 8.538494 | -8.51454 | 1.27E-16 | 1.39E-15 | 26.85444 |
| HNF4G       | 0.633678 | 5.727525 | 8.513759 | 1.28E-16 | 1.39E-15 | 26.84849 |
| CECR1       | -0.6582  | 8.066314 | -8.51169 | 1.30E-16 | 1.41E-15 | 26.8328  |
| LGALS4      | 1.220505 | 11.23956 | 8.505533 | 1.37E-16 | 1.48E-15 | 26.78604 |
| UPK1B       | 1.243148 | 5.589499 | 8.472147 | 1.77E-16 | 1.90E-15 | 26.53306 |
| SYTL5       | 0.6842   | 4.97022  | 8.470981 | 1.78E-16 | 1.91E-15 | 26.52425 |
| APOBEC3F // | -0.59228 | 5.509358 | -8.46238 | 1.90E-16 | 2.03E-15 | 26.4592  |
| BCL2A1      | -0.93391 | 7.665455 | -8.44615 | 2.16E-16 | 2.29E-15 | 26.33661 |
| MRVI1       | -0.83066 | 6.229261 | -8.41982 | 2.64E-16 | 2.77E-15 | 26.13813 |
| C2orf40     | -1.5625  | 6.322327 | -8.36645 | 3.97E-16 | 4.11E-15 | 25.73735 |
| ANKRD6      | -0.60974 | 4.92417  | -8.35801 | 4.23E-16 | 4.38E-15 | 25.67415 |
| NRN1        | -0.79243 | 5.873757 | -8.34886 | 4.53E-16 | 4.68E-15 | 25.60573 |
| MYLK        | -0.68253 | 4.44975  | -8.34881 | 4.54E-16 | 4.68E-15 | 25.60533 |
| MUC6        | 0.898123 | 5.855767 | 8.335879 | 5.00E-16 | 5.16E-15 | 25.50871 |
| TRIM22      | -0.64738 | 9.42747  | -8.33511 | 5.03E-16 | 5.18E-15 | 25.50298 |
| FCGR3B      | -0.75007 | 7.966358 | -8.30716 | 6.22E-16 | 6.37E-15 | 25.29449 |
| FAM19A4     | -0.7804  | 3.207039 | -8.30171 | 6.49E-16 | 6.63E-15 | 25.2539  |
| TMEM158     | -0.65123 | 7.76656  | -8.29217 | 6.97E-16 | 7.08E-15 | 25.18297 |
| SMARCA1     | -0.73455 | 6.444508 | -8.28996 | 7.09E-16 | 7.20E-15 | 25.16651 |
| MACC1       | 0.754836 | 6.94025  | 8.28893  | 7.14E-16 | 7.25E-15 | 25.15884 |
| RAB9B       | -0.60297 | 5.408729 | -8.27602 | 7.88E-16 | 7.96E-15 | 25.06295 |
| DDC         | 0.812976 | 6.899203 | 8.27242  | 8.09E-16 | 8.17E-15 | 25.03619 |
| ERICH5      | 0.758754 | 4.650616 | 8.264847 | 8.57E-16 | 8.62E-15 | 24.97999 |
| DSC2        | 0.807086 | 6.71289  | 8.260598 | 8.85E-16 | 8.90E-15 | 24.94848 |
| SULT1B1     | 0.736381 | 6.582977 | 8.259693 | 8.91E-16 | 8.95E-15 | 24.94177 |
| FABP4       | -0.73869 | 4.927755 | -8.25465 | 9.26E-16 | 9.29E-15 | 24.90442 |
| XDH         | 0.663975 | 6.050575 | 8.229136 | 1.12E-15 | 1.12E-14 | 24.71554 |
| PIK3C2G     | 1.069261 | 5.894967 | 8.215828 | 1.24E-15 | 1.23E-14 | 24.61724 |
| EVI2B       | -0.66982 | 7.755325 | -8.2079  | 1.32E-15 | 1.30E-14 | 24.5587  |
| SELL        | -0.74184 | 7.067506 | -8.20784 | 1.32E-15 | 1.30E-14 | 24.55826 |
| HABP2       | 0.798568 | 6.49039  | 8.207467 | 1.32E-15 | 1.30E-14 | 24.55553 |
| ONECUT2     | 0.905796 | 6.349986 | 8.200393 | 1.39E-15 | 1.37E-14 | 24.50337 |

|              |          |          |          |          |          |          |
|--------------|----------|----------|----------|----------|----------|----------|
| CLEC5A       | -0.76583 | 4.753798 | -8.19556 | 1.44E-15 | 1.42E-14 | 24.46775 |
| HOXA5        | -0.6759  | 7.057526 | -8.1888  | 1.52E-15 | 1.49E-14 | 24.41796 |
| TPD52        | 0.609778 | 9.470442 | 8.184974 | 1.56E-15 | 1.53E-14 | 24.38979 |
| SI           | 1.982326 | 6.074472 | 8.184508 | 1.57E-15 | 1.54E-14 | 24.38637 |
| NBEA         | -0.82009 | 5.539396 | -8.16812 | 1.77E-15 | 1.73E-14 | 24.26582 |
| GOS2         | -0.82702 | 8.155542 | -8.14913 | 2.04E-15 | 1.99E-14 | 24.12646 |
| MXRA5        | -0.66255 | 10.19438 | -8.1488  | 2.05E-15 | 1.99E-14 | 24.12402 |
| KCNE3        | 0.713316 | 7.22348  | 8.146141 | 2.09E-15 | 2.03E-14 | 24.10451 |
| MIEN1        | 0.606238 | 9.664508 | 8.144916 | 2.11E-15 | 2.04E-14 | 24.09553 |
| IGFBP3       | -0.59478 | 9.774982 | -8.11662 | 2.60E-15 | 2.51E-14 | 23.88835 |
| NGFRAP1      | -0.68082 | 10.57365 | -8.10852 | 2.76E-15 | 2.65E-14 | 23.82917 |
| PWAR6        | -0.67407 | 4.129088 | -8.10732 | 2.79E-15 | 2.67E-14 | 23.82041 |
| SDPR         | -0.76818 | 6.100543 | -8.09905 | 2.97E-15 | 2.84E-14 | 23.76007 |
| APOE         | -0.64752 | 8.257062 | -8.09745 | 3.00E-15 | 2.87E-14 | 23.74836 |
| SOCS2        | -0.67156 | 5.54635  | -8.09551 | 3.05E-15 | 2.91E-14 | 23.73422 |
| NEGR1        | -0.64505 | 4.564224 | -8.07967 | 3.42E-15 | 3.26E-14 | 23.61876 |
| GPR84        | -0.59314 | 4.756691 | -8.07456 | 3.56E-15 | 3.38E-14 | 23.58154 |
| SLC6A20      | 0.702168 | 5.641358 | 8.066636 | 3.77E-15 | 3.57E-14 | 23.52386 |
| PGAP3        | 0.614339 | 7.44755  | 8.063213 | 3.87E-15 | 3.66E-14 | 23.49895 |
| SLPI         | 1.028489 | 10.17174 | 8.060012 | 3.96E-15 | 3.75E-14 | 23.47568 |
| TGFBR3       | -0.74709 | 7.741978 | -8.04729 | 4.35E-15 | 4.10E-14 | 23.38325 |
| HYAL1        | 0.827752 | 6.514084 | 8.04366  | 4.47E-15 | 4.20E-14 | 23.35691 |
| KIAA1324     | 1.003622 | 6.866942 | 8.03955  | 4.61E-15 | 4.32E-14 | 23.32708 |
| CCL21        | -0.69565 | 6.672491 | -8.01978 | 5.33E-15 | 4.96E-14 | 23.1838  |
| RGS1         | -0.68257 | 8.248418 | -8.0095  | 5.75E-15 | 5.33E-14 | 23.1094  |
| GBP1         | -0.60863 | 9.398723 | -7.98331 | 6.98E-15 | 6.40E-14 | 22.92021 |
| C19orf33     | 0.909732 | 10.19422 | 7.976263 | 7.35E-15 | 6.72E-14 | 22.86942 |
| REG3A        | 1.021162 | 5.989029 | 7.963652 | 8.06E-15 | 7.35E-14 | 22.77857 |
| EPCAM        | 0.669869 | 12.33281 | 7.956955 | 8.46E-15 | 7.71E-14 | 22.73037 |
| PPAP2C       | 0.62581  | 8.181164 | 7.948653 | 8.99E-15 | 8.17E-14 | 22.67068 |
| TMPRSS3      | 0.858648 | 7.197294 | 7.933935 | 1.00E-14 | 9.04E-14 | 22.56496 |
| SFN          | 0.808037 | 10.93431 | 7.931178 | 1.02E-14 | 9.20E-14 | 22.54517 |
| MEP1B        | 0.68858  | 4.272823 | 7.930557 | 1.03E-14 | 9.24E-14 | 22.54072 |
| CLRN3        | 1.229524 | 8.558874 | 7.922946 | 1.09E-14 | 9.74E-14 | 22.48614 |
| GPR160       | 0.723646 | 9.635681 | 7.915092 | 1.15E-14 | 1.03E-13 | 22.42985 |
| CH25H        | -0.76933 | 6.51188  | -7.89563 | 1.32E-14 | 1.18E-13 | 22.29054 |
| TAC1         | -1.02279 | 3.620538 | -7.88372 | 1.44E-14 | 1.28E-13 | 22.2055  |
| KRT20        | 1.858285 | 8.02835  | 7.86787  | 1.62E-14 | 1.43E-13 | 22.0924  |
| ACE2         | 1.177643 | 6.091294 | 7.857517 | 1.75E-14 | 1.54E-13 | 22.01864 |
| TMEM178A     | -0.62576 | 4.490938 | -7.85126 | 1.83E-14 | 1.60E-13 | 21.97412 |
| GPR128       | 1.233741 | 6.076053 | 7.842063 | 1.95E-14 | 1.71E-13 | 21.90869 |
| SCIN         | 0.723648 | 5.785021 | 7.833947 | 2.07E-14 | 1.81E-13 | 21.85101 |
| LXN          | -0.59421 | 8.499973 | -7.8284  | 2.16E-14 | 1.88E-13 | 21.81165 |
| TNFRSF11A    | 0.707451 | 7.146306 | 7.825534 | 2.20E-14 | 1.91E-13 | 21.79127 |
| FAT4         | -0.61998 | 6.323057 | -7.81935 | 2.30E-14 | 2.00E-13 | 21.74738 |
| A1CF         | 0.810254 | 5.640177 | 7.815795 | 2.36E-14 | 2.05E-13 | 21.72219 |
| ZNF415       | -0.68824 | 4.496564 | -7.81381 | 2.40E-14 | 2.07E-13 | 21.70812 |
| MS4A8        | 0.736571 | 5.991756 | 7.800561 | 2.64E-14 | 2.27E-13 | 21.61427 |
| UGT8         | 0.856231 | 7.390286 | 7.798909 | 2.67E-14 | 2.30E-13 | 21.60258 |
| ACKR1        | -0.88278 | 6.726517 | -7.79093 | 2.83E-14 | 2.43E-13 | 21.54612 |
| PRAP1        | 0.999626 | 6.9865   | 7.773965 | 3.20E-14 | 2.73E-13 | 21.42627 |
| AZGP1        | 1.096525 | 6.050028 | 7.767842 | 3.34E-14 | 2.84E-13 | 21.38306 |
| PPP1R1B      | 1.037228 | 7.572861 | 7.740103 | 4.08E-14 | 3.42E-13 | 21.18767 |
| ADH1C        | 1.424726 | 8.961211 | 7.739986 | 4.08E-14 | 3.42E-13 | 21.18685 |
| PROM1        | 1.235852 | 9.380324 | 7.71614  | 4.84E-14 | 4.01E-13 | 21.01935 |
| AZGP1 /// A2 | 0.597857 | 5.903489 | 7.714152 | 4.91E-14 | 4.06E-13 | 21.0054  |
| E2F8         | 0.606578 | 7.127143 | 7.709491 | 5.07E-14 | 4.19E-13 | 20.97271 |
| WNT2         | -0.64072 | 5.976312 | -7.70223 | 5.34E-14 | 4.41E-13 | 20.92186 |

|              |          |          |          |          |          |          |
|--------------|----------|----------|----------|----------|----------|----------|
| GNAI1        | -0.64533 | 7.05346  | -7.70104 | 5.39E-14 | 4.44E-13 | 20.91349 |
| SLC26A3      | 0.823637 | 4.065849 | 7.698003 | 5.51E-14 | 4.53E-13 | 20.89222 |
| C1QTNF7      | -0.65088 | 4.385776 | -7.6932  | 5.70E-14 | 4.68E-13 | 20.85862 |
| TREM1        | -0.79004 | 6.233857 | -7.671   | 6.68E-14 | 5.44E-13 | 20.70343 |
| NAP1L5       | -0.62904 | 6.371114 | -7.63651 | 8.53E-14 | 6.88E-13 | 20.46305 |
| PRH1-PRR4    | 0.862534 | 5.477774 | 7.619034 | 9.66E-14 | 7.74E-13 | 20.34163 |
| GP2          | 1.026024 | 5.978894 | 7.588933 | 1.19E-13 | 9.48E-13 | 20.13299 |
| POF1B        | 0.785511 | 6.091552 | 7.563737 | 1.43E-13 | 1.12E-12 | 19.95888 |
| DIRAS3       | -0.65137 | 4.869741 | -7.55951 | 1.47E-13 | 1.15E-12 | 19.92973 |
| CLDN7        | 0.678308 | 9.725042 | 7.524076 | 1.88E-13 | 1.47E-12 | 19.68578 |
| OTC          | 0.893179 | 4.773871 | 7.515874 | 2.00E-13 | 1.55E-12 | 19.62945 |
| PKIB         | 0.854954 | 5.630151 | 7.514069 | 2.02E-13 | 1.56E-12 | 19.61706 |
| WASF3        | -0.79512 | 6.396668 | -7.50472 | 2.16E-13 | 1.67E-12 | 19.55295 |
| AQP5         | 0.760569 | 6.091276 | 7.497328 | 2.27E-13 | 1.75E-12 | 19.50227 |
| GPR155       | -0.61275 | 5.566267 | -7.49529 | 2.31E-13 | 1.77E-12 | 19.48831 |
| DPT          | -0.86402 | 5.672269 | -7.47869 | 2.59E-13 | 1.98E-12 | 19.37472 |
| LINC01207    | 1.242211 | 6.709676 | 7.464949 | 2.85E-13 | 2.17E-12 | 19.28086 |
| CFD          | -0.79127 | 8.184514 | -7.39622 | 4.59E-13 | 3.42E-12 | 18.81355 |
| FABP1        | 1.170214 | 6.126155 | 7.393032 | 4.69E-13 | 3.49E-12 | 18.79194 |
| TMEM139      | 0.637543 | 6.184489 | 7.378999 | 5.17E-13 | 3.83E-12 | 18.697   |
| FAM3D        | 0.990131 | 8.37421  | 7.367752 | 5.59E-13 | 4.13E-12 | 18.62102 |
| TDGF1 /// TC | 0.820266 | 6.18783  | 7.362845 | 5.78E-13 | 4.26E-12 | 18.5879  |
| KCNN4        | 0.656517 | 7.569321 | 7.352262 | 6.22E-13 | 4.57E-12 | 18.51653 |
| ABCG5        | 0.688383 | 4.671235 | 7.347514 | 6.42E-13 | 4.72E-12 | 18.48454 |
| GBP5         | -0.73934 | 6.543081 | -7.33771 | 6.87E-13 | 5.03E-12 | 18.41856 |
| UNC5CL       | 0.770467 | 7.191004 | 7.336755 | 6.92E-13 | 5.06E-12 | 18.41211 |
| LOC1019288   | 0.802476 | 5.294017 | 7.329973 | 7.25E-13 | 5.29E-12 | 18.3665  |
| CDH17        | 1.380344 | 8.983318 | 7.326248 | 7.43E-13 | 5.41E-12 | 18.34147 |
| MORN5        | -0.59752 | 4.276773 | -7.29258 | 9.36E-13 | 6.74E-12 | 18.11568 |
| IPW /// LOC: | -0.7583  | 5.849803 | -7.28915 | 9.58E-13 | 6.89E-12 | 18.09274 |
| HLA-DQA1 /   | -0.79186 | 10.05926 | -7.2746  | 1.06E-12 | 7.56E-12 | 17.99544 |
| PCDHB5       | -0.65643 | 4.043064 | -7.26819 | 1.11E-12 | 7.89E-12 | 17.95264 |
| SEMA3C       | -0.59984 | 7.156021 | -7.26466 | 1.13E-12 | 8.07E-12 | 17.92908 |
| PRIMA1       | -0.76363 | 5.8172   | -7.25762 | 1.19E-12 | 8.44E-12 | 17.88211 |
| CCL14 /// CC | -0.64545 | 7.095062 | -7.25543 | 1.21E-12 | 8.56E-12 | 17.86756 |
| GRB7         | 0.610775 | 6.393568 | 7.237813 | 1.36E-12 | 9.60E-12 | 17.75024 |
| GZMH         | -0.64596 | 6.436578 | -7.23397 | 1.40E-12 | 9.85E-12 | 17.7247  |
| SMPX         | -1.0101  | 4.520596 | -7.2274  | 1.46E-12 | 1.03E-11 | 17.68105 |
| ID4          | -0.59835 | 5.568891 | -7.22549 | 1.48E-12 | 1.04E-11 | 17.66836 |
| NARR /// RA  | -0.61266 | 8.408836 | -7.22429 | 1.49E-12 | 1.05E-11 | 17.66036 |
| RARRES1      | -0.9235  | 8.130682 | -7.20742 | 1.67E-12 | 1.17E-11 | 17.54846 |
| GZMK         | -0.78233 | 6.961842 | -7.20267 | 1.73E-12 | 1.20E-11 | 17.51695 |
| FOLR1        | 0.929084 | 5.757453 | 7.199799 | 1.76E-12 | 1.22E-11 | 17.49795 |
| TRIM31       | 0.771454 | 7.217075 | 7.197225 | 1.79E-12 | 1.24E-11 | 17.48091 |
| ITK          | -0.59104 | 6.187169 | -7.18622 | 1.93E-12 | 1.33E-11 | 17.40812 |
| PROK2        | -0.76599 | 4.214261 | -7.18173 | 1.99E-12 | 1.37E-11 | 17.37846 |
| LIPF         | 2.103247 | 7.664445 | 7.177128 | 2.05E-12 | 1.41E-11 | 17.34803 |
| CXCR4        | -0.60466 | 8.580622 | -7.17453 | 2.09E-12 | 1.43E-11 | 17.33088 |
| ST6GALNAC:   | 0.926004 | 8.6364   | 7.17387  | 2.10E-12 | 1.44E-11 | 17.32652 |
| AQP9         | -0.71691 | 6.74767  | -7.1706  | 2.14E-12 | 1.47E-11 | 17.30492 |
| TMEM200A     | -0.77621 | 7.296349 | -7.16163 | 2.28E-12 | 1.56E-11 | 17.24579 |
| NMU          | 1.043182 | 8.056741 | 7.157354 | 2.34E-12 | 1.60E-11 | 17.21759 |
| KCNE2        | 0.841626 | 6.41338  | 7.152055 | 2.43E-12 | 1.65E-11 | 17.18269 |
| NAT2         | 0.718688 | 5.769461 | 7.150194 | 2.46E-12 | 1.67E-11 | 17.17044 |
| CXCL14       | 1.093409 | 8.820789 | 7.136138 | 2.70E-12 | 1.83E-11 | 17.07798 |
| CYP39A1      | -0.64275 | 4.641026 | -7.13434 | 2.73E-12 | 1.85E-11 | 17.0662  |
| SNAP25       | -0.61065 | 4.370456 | -7.12302 | 2.95E-12 | 1.98E-11 | 16.99181 |
| LYZ          | 0.747408 | 11.38706 | 7.114959 | 3.11E-12 | 2.08E-11 | 16.93897 |

|              |          |          |          |          |          |          |
|--------------|----------|----------|----------|----------|----------|----------|
| REEP6        | 0.656303 | 6.540774 | 7.102326 | 3.39E-12 | 2.26E-11 | 16.85621 |
| MYOCD        | -0.82365 | 6.09169  | -7.04517 | 4.96E-12 | 3.23E-11 | 16.48332 |
| TNXA /// TN  | -0.58706 | 7.191466 | -7.00222 | 6.60E-12 | 4.23E-11 | 16.20483 |
| TSPAN8       | 0.867481 | 12.63741 | 6.99449  | 6.94E-12 | 4.44E-11 | 16.15489 |
| GAST         | 0.796913 | 6.10621  | 6.980758 | 7.60E-12 | 4.85E-11 | 16.06624 |
| HPGD         | 0.991496 | 8.421866 | 6.973305 | 7.99E-12 | 5.08E-11 | 16.01818 |
| TM4SF4       | 1.232391 | 7.050431 | 6.968552 | 8.24E-12 | 5.23E-11 | 15.98756 |
| GPA33        | 0.912003 | 7.293277 | 6.967474 | 8.30E-12 | 5.26E-11 | 15.98062 |
| BLNK         | 0.600244 | 8.431867 | 6.939466 | 9.98E-12 | 6.24E-11 | 15.80055 |
| FCGBP        | 1.230175 | 8.277766 | 6.938108 | 1.01E-11 | 6.29E-11 | 15.79184 |
| AURKA        | 0.596262 | 8.478655 | 6.93407  | 1.03E-11 | 6.45E-11 | 15.76594 |
| A4GNT        | 0.681508 | 5.121279 | 6.923907 | 1.10E-11 | 6.88E-11 | 15.7008  |
| PDZK1IP1     | 0.911353 | 9.119017 | 6.902058 | 1.27E-11 | 7.86E-11 | 15.56103 |
| MSMB         | 1.681121 | 6.631235 | 6.896452 | 1.32E-11 | 8.14E-11 | 15.52523 |
| LTF          | 1.372284 | 7.963845 | 6.8861   | 1.41E-11 | 8.69E-11 | 15.45919 |
| BNIP3        | -0.68258 | 7.136771 | -6.86284 | 1.65E-11 | 9.99E-11 | 15.3111  |
| FGF13        | -0.76617 | 5.790696 | -6.86009 | 1.68E-11 | 1.01E-10 | 15.29365 |
| ANKRD22      | 0.646613 | 8.307445 | 6.841414 | 1.89E-11 | 1.14E-10 | 15.17508 |
| PCOLCE2      | -0.65772 | 4.496361 | -6.82716 | 2.08E-11 | 1.25E-10 | 15.08476 |
| ALDH1A1      | 0.854943 | 10.14638 | 6.825503 | 2.10E-11 | 1.26E-10 | 15.07431 |
| STXBP1       | -0.58603 | 7.343443 | -6.825   | 2.10E-11 | 1.26E-10 | 15.07111 |
| VLDLR        | -0.71796 | 5.468212 | -6.82131 | 2.16E-11 | 1.29E-10 | 15.04776 |
| REG1A        | 1.649927 | 9.558243 | 6.803232 | 2.42E-11 | 1.44E-10 | 14.93359 |
| RAI2         | -0.67266 | 6.465914 | -6.78927 | 2.65E-11 | 1.57E-10 | 14.84555 |
| CEACAM5      | 0.630651 | 8.082739 | 6.786113 | 2.71E-11 | 1.60E-10 | 14.82569 |
| SST          | 1.17076  | 5.854854 | 6.764873 | 3.10E-11 | 1.82E-10 | 14.69214 |
| GIPC2        | 0.663459 | 7.446953 | 6.761837 | 3.16E-11 | 1.85E-10 | 14.67308 |
| FKBP1B       | 0.617743 | 8.070471 | 6.754125 | 3.32E-11 | 1.94E-10 | 14.6247  |
| PROS1        | -0.61433 | 8.027794 | -6.75411 | 3.32E-11 | 1.94E-10 | 14.62463 |
| KLHL13       | -0.78155 | 5.64013  | -6.73287 | 3.81E-11 | 2.21E-10 | 14.49163 |
| CDC20        | 0.586137 | 8.488624 | 6.727097 | 3.95E-11 | 2.29E-10 | 14.45552 |
| CYBRD1       | -0.62611 | 7.778684 | -6.72567 | 3.99E-11 | 2.31E-10 | 14.44661 |
| LINC00261    | 0.975663 | 6.925434 | 6.704139 | 4.58E-11 | 2.63E-10 | 14.31227 |
| EPDR1        | -0.66808 | 7.500446 | -6.70128 | 4.66E-11 | 2.67E-10 | 14.29443 |
| CCL5         | -0.61576 | 8.55373  | -6.66558 | 5.85E-11 | 3.30E-10 | 14.07263 |
| GPR64        | 0.729952 | 4.870188 | 6.659002 | 6.10E-11 | 3.43E-10 | 14.03186 |
| EPYC         | -0.63653 | 3.139256 | -6.65701 | 6.18E-11 | 3.47E-10 | 14.0195  |
| H19 /// MIR6 | -1.02421 | 6.651662 | -6.65677 | 6.19E-11 | 3.47E-10 | 14.01807 |
| MALL         | 0.628163 | 8.59872  | 6.651041 | 6.42E-11 | 3.60E-10 | 13.98258 |
| METTL7B      | 0.591909 | 7.34512  | 6.625094 | 7.56E-11 | 4.20E-10 | 13.8223  |
| MEP1A        | 1.091894 | 6.278543 | 6.605197 | 8.57E-11 | 4.74E-10 | 13.69976 |
| SERPINA4     | 0.629802 | 6.453326 | 6.585221 | 9.72E-11 | 5.33E-10 | 13.57705 |
| TFF3         | 1.027525 | 8.818916 | 6.582103 | 9.92E-11 | 5.43E-10 | 13.55793 |
| SLC7A11      | 0.640785 | 6.570477 | 6.580818 | 1.00E-10 | 5.47E-10 | 13.55005 |
| TM4SF20      | 1.22913  | 6.863206 | 6.572644 | 1.05E-10 | 5.73E-10 | 13.49996 |
| S100A8       | -0.66993 | 7.151216 | -6.56949 | 1.07E-10 | 5.84E-10 | 13.48067 |
| SFTA2        | 0.947712 | 6.454348 | 6.567979 | 1.08E-10 | 5.89E-10 | 13.4714  |
| KLK11        | 0.782592 | 6.675258 | 6.566164 | 1.10E-10 | 5.95E-10 | 13.46029 |
| MAP7D2       | 0.877685 | 4.943134 | 6.53434  | 1.34E-10 | 7.19E-10 | 13.26597 |
| P2RY14       | -0.71207 | 7.044931 | -6.51707 | 1.49E-10 | 7.95E-10 | 13.16085 |
| TMED6        | 0.770473 | 4.917    | 6.481538 | 1.86E-10 | 9.80E-10 | 12.94536 |
| APOD         | -0.91459 | 7.399778 | -6.47935 | 1.88E-10 | 9.92E-10 | 12.9321  |
| ORM1 /// OF  | 0.991128 | 5.407264 | 6.477592 | 1.90E-10 | 1.00E-09 | 12.92149 |
| CCL18        | -0.78448 | 8.313283 | -6.46532 | 2.06E-10 | 1.08E-09 | 12.84735 |
| CRNDE        | 0.635479 | 6.951605 | 6.464616 | 2.06E-10 | 1.08E-09 | 12.84309 |
| AFAP1-AS1    | 0.728516 | 5.743023 | 6.450076 | 2.26E-10 | 1.18E-09 | 12.7554  |
| GBA3         | 0.82166  | 4.657332 | 6.436782 | 2.45E-10 | 1.27E-09 | 12.67538 |
| AQP1         | -0.64512 | 8.265253 | -6.42063 | 2.71E-10 | 1.39E-09 | 12.57832 |



|              |          |          |          |          |          |          |
|--------------|----------|----------|----------|----------|----------|----------|
| RASSF10      | 0.733955 | 5.309952 | 6.415712 | 2.79E-10 | 1.43E-09 | 12.54885 |
| OLFM4        | 1.636316 | 9.731053 | 6.394886 | 3.17E-10 | 1.61E-09 | 12.42414 |
| SLC26A9      | 0.734219 | 5.646925 | 6.376023 | 3.56E-10 | 1.80E-09 | 12.31148 |
| TSPYL5       | -0.74282 | 7.024878 | -6.37262 | 3.64E-10 | 1.83E-09 | 12.29117 |
| HMGCS2       | 0.810496 | 6.490515 | 6.284853 | 6.20E-10 | 3.04E-09 | 11.77113 |
| FAM110C      | 0.705556 | 7.157174 | 6.268765 | 6.84E-10 | 3.32E-09 | 11.67649 |
| FLJ22763     | 0.798197 | 4.126722 | 6.263808 | 7.04E-10 | 3.41E-09 | 11.64737 |
| CCL19        | -0.84057 | 7.12988  | -6.21339 | 9.54E-10 | 4.53E-09 | 11.35236 |
| REG4         | 1.494655 | 8.287943 | 6.185871 | 1.12E-09 | 5.29E-09 | 11.19223 |
| SPINK1       | 1.018287 | 11.88018 | 6.164275 | 1.28E-09 | 5.97E-09 | 11.06701 |
| CEACAM6      | 1.094303 | 10.50969 | 6.148645 | 1.40E-09 | 6.52E-09 | 10.97662 |
| TCN1         | 1.172814 | 8.162634 | 6.148014 | 1.41E-09 | 6.54E-09 | 10.97297 |
| DMBT1        | 1.040602 | 9.342089 | 6.143227 | 1.45E-09 | 6.72E-09 | 10.94533 |
| KIT          | -0.63463 | 7.314633 | -6.14155 | 1.46E-09 | 6.78E-09 | 10.93568 |
| F5           | 0.8419   | 6.796857 | 6.128692 | 1.58E-09 | 7.28E-09 | 10.86152 |
| ACSM3        | 0.60406  | 6.133781 | 6.089495 | 1.99E-09 | 9.05E-09 | 10.63638 |
| SBSPON       | -0.70403 | 5.022311 | -6.08621 | 2.03E-09 | 9.20E-09 | 10.61759 |
| SHISA3       | -0.59951 | 4.206076 | -6.08561 | 2.04E-09 | 9.23E-09 | 10.61416 |
| HCAR3        | -0.90846 | 6.418545 | -6.07917 | 2.12E-09 | 9.58E-09 | 10.57727 |
| SDR16C5      | 0.929095 | 7.805307 | 6.040343 | 2.66E-09 | 1.18E-08 | 10.35587 |
| CYP4F3       | 0.635504 | 5.732597 | 6.021198 | 2.97E-09 | 1.31E-08 | 10.24716 |
| SLC6A14      | 1.129975 | 7.672433 | 6.00034  | 3.36E-09 | 1.47E-08 | 10.12906 |
| QPCT         | -0.62099 | 7.02378  | -5.96304 | 4.17E-09 | 1.80E-08 | 9.918768 |
| PBK          | 0.60535  | 8.481762 | 5.960744 | 4.22E-09 | 1.83E-08 | 9.905887 |
| PFN2         | -0.60354 | 8.766134 | -5.9456  | 4.61E-09 | 1.98E-08 | 9.820902 |
| TFPI2        | -0.6591  | 5.095419 | -5.92822 | 5.10E-09 | 2.18E-08 | 9.723548 |
| IL1R2        | 0.68437  | 7.758841 | 5.828822 | 9.00E-09 | 3.71E-08 | 9.171841 |
| MAMDC2       | -0.7921  | 4.640331 | -5.81418 | 9.78E-09 | 4.01E-08 | 9.091257 |
| TMPRSS15     | 0.692988 | 4.76486  | 5.813384 | 9.82E-09 | 4.03E-08 | 9.0869   |
| LOC1019298   | 1.480102 | 7.64011  | 5.776739 | 1.21E-08 | 4.88E-08 | 8.886086 |
| GSPT2        | -0.59478 | 6.581338 | -5.76825 | 1.27E-08 | 5.10E-08 | 8.839738 |
| SCG2         | -0.66287 | 4.921871 | -5.76501 | 1.29E-08 | 5.19E-08 | 8.822038 |
| DEFB1        | 0.795899 | 6.474301 | 5.721148 | 1.65E-08 | 6.54E-08 | 8.583621 |
| CHI3L1       | -0.78721 | 6.684163 | -5.67265 | 2.16E-08 | 8.40E-08 | 8.321912 |
| MMP9         | -0.59388 | 8.188809 | -5.63286 | 2.69E-08 | 1.03E-07 | 8.108694 |
| APOA1        | 0.62477  | 5.336634 | 5.61268  | 3.01E-08 | 1.14E-07 | 8.001048 |
| RBP2         | 0.794417 | 5.960267 | 5.579052 | 3.62E-08 | 1.36E-07 | 7.822477 |
| PLAC8        | 0.763584 | 9.814542 | 5.562958 | 3.95E-08 | 1.47E-07 | 7.737357 |
| HTR2B        | -0.7399  | 5.14459  | -5.55775 | 4.07E-08 | 1.51E-07 | 7.709876 |
| CCL11        | -0.71766 | 8.327245 | -5.54178 | 4.44E-08 | 1.64E-07 | 7.625709 |
| CYP2B6 /// C | 0.710445 | 6.99561  | 5.517501 | 5.06E-08 | 1.85E-07 | 7.498141 |
| GUCY2C       | 0.849508 | 6.905393 | 5.486164 | 6.00E-08 | 2.16E-07 | 7.334263 |
| REEP1        | -0.64148 | 6.102765 | -5.45553 | 7.07E-08 | 2.53E-07 | 7.174872 |
| LRRC19       | 0.652014 | 4.41981  | 5.444017 | 7.53E-08 | 2.68E-07 | 7.115198 |
| GC           | 0.843933 | 4.400397 | 5.415932 | 8.74E-08 | 3.08E-07 | 6.970069 |
| AADACP1      | 0.618166 | 5.035621 | 5.353161 | 1.22E-07 | 4.21E-07 | 6.648171 |
| GIF          | 1.122284 | 5.658435 | 5.283327 | 1.76E-07 | 5.93E-07 | 6.294075 |
| PDZK1        | 0.689941 | 5.034763 | 5.270359 | 1.88E-07 | 6.32E-07 | 6.228789 |
| IFI44L       | -0.63952 | 7.306234 | -5.24529 | 2.15E-07 | 7.13E-07 | 6.102993 |
| STK31        | 0.640337 | 5.797463 | 5.241859 | 2.19E-07 | 7.25E-07 | 6.085819 |
| CYP4X1       | 0.677803 | 5.748537 | 5.217899 | 2.47E-07 | 8.14E-07 | 5.966174 |
| CHP2         | 0.631234 | 5.754295 | 5.153675 | 3.44E-07 | 1.11E-06 | 5.647946 |
| CLCA1        | 0.901126 | 5.750157 | 5.152233 | 3.47E-07 | 1.11E-06 | 5.640842 |
| DAZ1 /// DA  | 1.00426  | 4.86596  | 5.106929 | 4.37E-07 | 1.38E-06 | 5.418596 |
| MLF1         | -0.61447 | 5.883131 | -5.09589 | 4.62E-07 | 1.46E-06 | 5.364718 |
| VNN1         | 0.718795 | 7.162685 | 5.091624 | 4.72E-07 | 1.49E-06 | 5.343918 |
| CLDN2        | 0.603271 | 6.434714 | 5.076723 | 5.09E-07 | 1.59E-06 | 5.271413 |
| IGH /// IGHA | 0.830128 | 11.2933  | 5.003257 | 7.36E-07 | 2.25E-06 | 4.9168   |

|              |          |          |          |          |          |          |
|--------------|----------|----------|----------|----------|----------|----------|
| ANXA13       | 0.714499 | 7.400294 | 4.974369 | 8.50E-07 | 2.56E-06 | 4.778669 |
| CXCL10       | -0.59935 | 8.933506 | -4.97404 | 8.51E-07 | 2.57E-06 | 4.777095 |
| TMEM100      | -0.68848 | 6.01452  | -4.95847 | 9.19E-07 | 2.76E-06 | 4.702958 |
| ITLN1        | 0.976245 | 6.864362 | 4.954995 | 9.35E-07 | 2.80E-06 | 4.686439 |
| LOC1019300   | 0.588749 | 4.249816 | 4.883205 | 1.33E-06 | 3.89E-06 | 4.347592 |
| CXCL9        | -0.62692 | 8.659212 | -4.88027 | 1.35E-06 | 3.94E-06 | 4.333823 |
| HS6ST2       | -0.60383 | 3.934051 | -4.83774 | 1.66E-06 | 4.76E-06 | 4.135378 |
| CCL15 /// CC | 0.67304  | 6.807473 | 4.827889 | 1.74E-06 | 4.98E-06 | 4.089624 |
| IGJ          | 0.722754 | 10.82514 | 4.708375 | 3.09E-06 | 8.46E-06 | 3.541576 |
| PPBP         | -0.66297 | 4.772479 | -4.60346 | 5.05E-06 | 1.34E-05 | 3.071022 |
| CLDN3        | 0.603896 | 7.340711 | 4.596504 | 5.21E-06 | 1.38E-05 | 3.040169 |
| MTTP         | 0.742421 | 4.749589 | 4.538073 | 6.82E-06 | 1.77E-05 | 2.782754 |
| LGALS2       | 0.59734  | 7.643521 | 4.471574 | 9.24E-06 | 2.34E-05 | 2.493546 |
| IL33         | -0.61956 | 6.878655 | -4.45217 | 1.01E-05 | 2.55E-05 | 2.409911 |
| LEFTY1       | 0.809681 | 5.520216 | 4.438664 | 1.07E-05 | 2.70E-05 | 2.351898 |
| ADH1B        | -0.6213  | 5.209647 | -4.42075 | 1.16E-05 | 2.90E-05 | 2.275194 |
| PI3          | 0.719354 | 8.393255 | 4.394526 | 1.31E-05 | 3.23E-05 | 2.163465 |
| PCK1         | 0.705415 | 5.773236 | 4.280884 | 2.16E-05 | 5.17E-05 | 1.686452 |
| SPINK4       | 0.849286 | 7.516716 | 4.059849 | 5.54E-05 | 0.000123 | 0.792457 |
| CXCL11       | -0.60215 | 6.769035 | -3.97403 | 7.90E-05 | 0.000171 | 0.457457 |
| CXCL13       | -0.63161 | 7.930186 | -3.77263 | 0.000177 | 0.000362 | -0.30199 |
| HLA-DQA1 /   | -0.63304 | 6.058747 | -3.43119 | 0.000641 | 0.001192 | -1.50308 |
| CPS1         | 0.59207  | 6.702625 | 2.988244 | 0.002917 | 0.004844 | -2.8975  |
